1 **Single-nucleus resolution mapping of the adult *C. elegans* and its application to**  
2 **elucidate inter- and trans-generational response to alcohol.**

3  
4  
5 Lisa Truong<sup>1,2</sup>, Yen-Wei Chen<sup>1,3</sup>, Rio Barrere-Cain<sup>4</sup>, Karissa Shuck<sup>4</sup>, Wen Xiao<sup>5</sup>, Max T.  
6 Levenson<sup>3</sup>, Eduardo da Veiga Beltrame<sup>6</sup>, Blake Panter<sup>4</sup>, Ella Reich<sup>4</sup>, Paul W.  
7 Sternberg<sup>6</sup>, Xia Yang<sup>7</sup>, Patrick Allard<sup>3,4, 8\*</sup>  
8

- 9 1. Authors contributed equally to the work  
10 2. Human Genetics Graduate Program, UCLA, Los Angeles, CA. 90095.  
11 3. Molecular Toxicology Inter-Departmental Program, UCLA, Los Angeles, CA. 90095.  
12 4. Institute for Society & Genetics, UCLA, Los Angeles, CA. 90095.  
13 5. Department of Microbiology, Immunology, and Molecular Genetics, UCLA, Los  
14 Angeles, CA. 90095.  
15 6. Biology and Biological Engineering, California Institute of Technology, Pasadena,  
16 CA. 91125.  
17 7. Integrative Biology and Physiology Department, UCLA, Los Angeles, CA. 90095.  
18 8. Molecular Biology Institute, UCLA, Los Angeles, CA. 90095.

19  
20 \* Corresponding Author  
21  
22

23 **Email: [pallard@ucla.edu](mailto:pallard@ucla.edu)**  
24 **<https://orcid.org/0000-0001-7765-1547>**  
25  
26

27 **Keywords**

28 *C. elegans*, snRNA-seq, ethanol, alcohol  
29  
30

31 **Author Contributions**

32 LT, RBC, KS, WX, MTL, BP, and EL performed biological experiments and  
33 corresponding analyses, YWC performed bioinformatic analyses, PA and XY  
34 supervised experiments, PA and XY supervised analyses, EB devised a visualization  
35 approach that assisted cell type assignment and cluster identification which PS  
36 supervised, LT, RBC, YWC, XY, and PA wrote the manuscript.

37 **ABSTRACT**

38           Single-cell RNA transcriptomic platforms have significantly contributed to our  
39 understanding of tissue heterogeneity as well as of developmental and cellular  
40 differentiation trajectories. They also provide an opportunity to map an organism's  
41 response to environmental cues with high resolution and unbiasedly identify the cell  
42 types that are the most transcriptionally sensitive to exposures. Here, we applied single  
43 nucleus RNA-seq experimental and computational approaches to *C. elegans* to  
44 establish the transcriptome of the adult nematode and comprehensively characterize  
45 the transcriptional impact of ethanol as a model environmental exposure on the entire  
46 organism at cell type-resolution over several generations. Clustering, tissue and  
47 phenotype enrichment, and gene ontology analyses identified 31 clusters representing a  
48 diverse number of adult cell types, including those from syncytial and multi-nucleated  
49 tissues which are difficult to assess by single cell RNA-seq, such as the mitotic and  
50 meiotic germline, hypodermal cells, and the intestine. We applied this method to identify  
51 the impact of inter- and trans-generational exposure to two human-relevant doses of  
52 alcohol. Cell type proportions were not significantly altered by ethanol. However,  
53 Euclidean distance analysis identified several germline, striated muscle, and neuronal  
54 clusters as being major transcriptional targets of ethanol at both the F1 and F3  
55 generations although the relative order of clusters changed between generations. The  
56 impact on germline clusters was further confirmed by phenotypic enrichment analysis as  
57 well as functional validation, namely a remarkable inter- and trans- generational  
58 increase in germline apoptosis, aneuploidy, and embryonic lethality. Together, snRNA-  
59 seq of the adult *C. elegans* represents a powerful approach for the detailed examination

60 of an adult organism's response to environmental cues.

61

## 62 **INTRODUCTION**

63 In mammals, *in utero* exposure to alcohol is associated with an array of well-  
64 characterized morphological, neurological, and reproductive deficits in the F1 progeny  
65 that are grouped into symptoms of Fetal Alcohol Syndrome Disorders (FASD) [1]. The  
66 plurality of the conditions associated with FASD reflects the variety of organ systems  
67 and processes showing structural and functional anomalies following prenatal alcohol  
68 exposure, such as the reproductive system, the central nervous system, craniofacial  
69 morphogenesis, the heart, kidney, liver, and gastrointestinal system (reviewed in [2,3]).  
70 However, while *in utero* alcohol exposure clearly impacts the function of multiple organ  
71 systems, a comprehensive assessment of all organs, tissues, and cell types that are the  
72 most affected by alcohol remains lacking [4].

73 In addition to impacting the health of the F1 progeny, mounting evidence in  
74 various model systems, such as mice, rats, *Drosophila*, and *C. elegans*, indicates that at  
75 least some exposure-related adverse reproductive and neurobehavioral features also  
76 extend beyond the F1 and are detectable in F3 progeny [5–8]. For instance, a rat model  
77 of late gestational ethanol exposure demonstrated that not only F1 but also F2 and F3  
78 individuals show an average 50% increase in ethanol intake [9]. Moreover,  
79 preconception exposure is sufficient to cause increased alcohol intake in the offspring,  
80 together with signs of spatial learning and memory deficits [10]. Notably, the impact of  
81 ethanol on alcohol and substance use across several generations is observed in the  
82 broader context of several established multi- and transgenerational models in which

83 various cognitive, behavioral, or physical endpoints are altered (reviewed in [11,12]).

84 *C. elegans* is a simplified but highly advantageous model for studying the effects  
85 of alcohol and is the most used invertebrate species for modeling FASD (reviewed in  
86 [13]). Direct exposure to ethanol causes a variety of dose- and duration-dependent  
87 outcomes similar to those elicited in mammals such as growth and fertility impairments,  
88 neuro-depressive effects, increase alcohol preference and disinhibition, withdrawal, all  
89 supported by the involvement of similar cellular and neurological pathways [14–18]. The  
90 *C. elegans* genome is also equipped with the conserved gene families of alcohol and  
91 aldehyde dehydrogenases that provide the main metabolic activity towards ethanol  
92 which is first processed into acetaldehyde and subsequently into acetate [19]. Finally, its  
93 reproductive system, with two gonads opening into a common uterus where embryos  
94 initiate their development, provides a window for *in utero* exposure to alcohol.

95 Recently, the combination of single-cell RNA sequencing (scRNA-seq)  
96 technologies and the tractability of the model organism *C. elegans*, with its well-  
97 established differentiation lineages and timing, has enabled the layering of  
98 transcriptional data with developmental events at both embryonic and larval (L2) stages,  
99 as well as the mapping of the entire nervous system [20–22]. This has led, for example,  
100 to the identification of gene expression changes that track the development of 502  
101 preterminal and terminal cell types in embryos [21] and the characterization of 27  
102 distinct cell types at larval stages [20]. Furthermore, we and others have shown that *C.*  
103 *elegans* is also a powerful model for the study of multi- and trans- generational  
104 responses to environmental stimuli [23–28]. However, single cell transcriptomic  
105 approaches have yet to be applied to the characterization of environmental exposures,



106 including alcohol, at the whole organism level and across generations.

107         Here, we used RNA-seq from single nuclei to maximize the isolation of diverse  
108 cell types, including from the approximately 30% of all somatic cells that are polyploid  
109 and from the mostly syncytial adult germline. We applied this approach to examine the  
110 transcriptional impact of parental (P0) exposure to two physiologically relevant doses of  
111 ethanol on the F1 offspring (inter-generational exposure) as well as on the F3  
112 generation (trans-generational exposure). We show that single nucleus RNA-seq  
113 (snRNA-seq) identifies a large number of distinct cell types that resolve into well-  
114 characterized cellular and functional identities. We also demonstrate that this powerful  
115 method can provide insights into the effect of inter- and trans- generational exposure to  
116 ethanol at tissue and cell-type specific resolution and identify the cells and molecular  
117 pathways that are most impacted by such exposures.

118

## 119 **MATERIAL AND METHODS**

### 120 **Culture conditions and strains**

121         The strain JK560 *fog-1(q253)* was used for sequencing and single molecule  
122 fluorescence *in situ* hybridization (smFISH) experiments. N2 (wild type) worms were  
123 used for embryonic lethality and acridine orange apoptosis experiments. The strain  
124 TY2441 (*Pxol-1::gfp; rol-6(pRF4)*) was used for X chromosome aneuploidy  
125 experiments. Worms were cultured on standard nematode growth medium (NGM)  
126 plates streaked with single colony OP50 *E. coli* and maintained at 20°C. The generation  
127 of worms to be collected for single-nucleus analysis was moved to 25°C at the L1 stage  
128 and grown at 25°C for 48 hours until the beginning of day 2 of adulthood. To collect L1

129 larvae from the F1 generation, worms were synchronized by bleaching P0 gravid adults  
130 and having their F1 embryos subsequently grown for 16 hours at 20°C at which time all  
131 F1 were at the L1 stage. To collect L1 larvae from the F3 generation, the L1 larvae were  
132 collected through filtration using a 10µm nylon mesh filter (EDM Millipore NY1102500  
133 and EDM Millipore SX00025000) which only allows L1 stage worms to pass through. L1  
134 worms for both generations were kept for 48 hours at 25°C and then washed with five  
135 rounds of M9 buffer and centrifuged at 1,300g for 1 minute to pellet worms between  
136 each wash. After the final wash, worms were spun in a rotator with 1mL of M9 for 30  
137 minutes to remove OP50 from the worms' gut. The worms were then allowed to settle  
138 by gravity for 5 minutes and the final compact worm pellet volume was adjusted to  
139 30µL. The aforementioned strains were obtained from the *C. elegans* Genetics Center  
140 (CGC): JK560 *fog-1(q253)* I; TY2441 *yls34 (Pxol-1::gfp+rol-6 (pRF4))* (obtained by  
141 crossing *him-8(e1489)* out of TY2431); N2: wild-type.

142

### 143 ***C. elegans* ethanol exposure**

144 For ethanol exposures, a population of gravid adult worms was bleached. The  
145 embryos obtained were plated on standard OP50 seeded NGM plates and allowed to  
146 grow to the L4 stage (approximately 50 hours post bleaching). Nematodes were  
147 exposed for 48 hours in a liquid culture containing M9 buffer solution, standard OP50  
148 bacteria (10mg/mL), and ethanol at a final concentration of 0.05% or 0.50% in 15mL  
149 conical tubes. Following liquid exposure, the F1 progeny of the exposed P0 generation  
150 was split into two sets of plates, one for collecting the F1 adults and one for  
151 maintenance until the F3 generation. This scheme ensured the comparability of F1 and

152 F3 snRNA-seq data.

153

### 154 **Single-nucleus dissociation**

155 All single-nucleus dissociation steps were done at 4°C. A compact 30µL pellet of  
156 adult *JK560 C. elegans* (approximately 4,000 worms) was transferred to a prechilled  
157 Dounce homogenizer (Sigma Z378623-1EA) and homogenized for 10 strokes with  
158 400µL of ice cold FA lysis buffer (50mM HEPES/NaOH pH 7.5, 1mM EDTA, 0.1% Triton  
159 X-100, 150mM NaCl, protease inhibitor 0.5X (Roche 11697498001), RNase inhibitor  
160 0.2U/µL (Thermo Fisher 10777019), and RNase free water). Worms were homogenized  
161 for 10 strokes in a 1.5mL Wheaton Dounce homogenizer and for an additional 20  
162 strokes (350µL FA buffer) with an Eppendorf Dounce homogenizer (Fisher 06-434) in a  
163 corkscrew fashion. Between each set of 10 homogenization strokes, debris was pelleted  
164 using 100g for 1 minute and supernatant containing nuclei was collected and pooled in  
165 a fresh 1.5mL low retention microcentrifuge tube.

166 After homogenization, the pooled supernatant containing nuclei was centrifuged  
167 at 100g for 1 minute to pellet remaining debris. The top 900µL of supernatant with nuclei  
168 was transferred to a fresh 1.5mL low retention microcentrifuge tube and washed once  
169 with 1% PBS BSA ((Thermo Fisher AM9624) that was filtered with a 0.22µm pressure  
170 filter (Thermo Scientific 03-377-26, Fisher SLGP033RS)). Nuclei were pelleted at 500g  
171 for 4 minutes, resuspended in 750-850µL 1% PBS-BSA, and then filtered using a 40µm  
172 Flowmi tip filter (Sigma-Aldrich BAH136800040-50EA).

173 Nuclei integrity was verified by staining single-nuclei isolations with DAPI and  
174 observing the nuclei under a fluorescent microscope. The nuclei did not have a frayed

175 appearance and were compact. Nuclei extractions were performed at 4°C in a timely  
176 fashion to prevent cellular transcription during the dissociation process. On average, a  
177 total of 1,200 nuclei is obtained per batch of 4,000 worms. Flow cytometry was used to  
178 ensure optimal nuclei concentration (700-1200 events/ $\mu$ l).

179

### 180 **Single molecule fluorescence *in situ* hybridization**

181 Single molecule fluorescence *in situ* hybridization (smFISH) was performed on  
182 F1 and F3 adults that were maintained, exposed, and filtered in a similar manner to  
183 animals used in the single-nucleus dissociation protocol. SmFISH was performed using  
184 the protocol developed by the Kimble Lab [29]. Probes were designed and ordered  
185 through Stellaris and are compiled in Table S1. Both probes were used at a final  
186 concentration of 0.25 $\mu$ M with approximately 100 dissected worms per condition.  
187 Samples were mounted on slides using fluoroshield with DAPI (Sigma-Aldrich F6057).  
188 Slides were imaged on the Leica SP8 confocal microscope. Fluorescence images were  
189 quantified using FISH-Quant v3 [30].

190

### 191 **Embryonic lethality assessment, *xol-1::gfp* analysis, and apoptosis assay**

192 Embryonic lethality was performed on wild-type N2 F1 and F3 worms. At both  
193 generations, L4s were singled out and moved onto individual 33mm plates. Embryonic  
194 lethality was performed by monitoring the number of embryos produced each day and  
195 the subsequent larvae that hatched from these embryos for each individual worm  
196 spanning its entire reproductive lifespan. *Pxol-1::gfp* analysis was done by fluorescent  
197 microscopy on 24-hours post-L4 F1 and F3 adults and the occurrence of GFP+

198 embryos (expressing *Pxol-1::gfp*) was recorded. The proportion of XOL-1::GFP+ was  
199 calculated by dividing the number of worms with at least 1 GFP+ embryo by the total  
200 number of worms analyzed [31]. Apoptosis assays were performed on wild-type N2  
201 worms by Acridine Orange staining of synchronized adult hermaphrodites collected at  
202 20-24 hours post-L4 at the F1 and F3 generations as previously described [32,33].

203

204 **Expanded Material and Methods, including computational analyses, can be found**  
205 **in the supplemental information section.**

206

## 207 **RESULTS**

### 208 **SnRNA-seq identifies a wide array of defined cell types in the adult *C. elegans***

209 Intact nuclei were isolated from adult *fog-1(q253)* *C. elegans* raised at the  
210 restrictive temperature of 25°C [34]. Since the focus of our study was on the  
211 characterization of adult tissues response to ethanol, this sperm-defective strain was  
212 used to prevent self-fertilization and the crowding of our snRNA-seq data with  
213 embryonic cell types (see material and methods section). Briefly, worms were  
214 synchronized and allowed to grow to day one of adulthood before mechanical nuclear  
215 extraction (Figure 1A). Nuclei concentration was determined using flow cytometry and  
216 nuclear integrity was assessed by high-resolution microscopy. Single nucleus RNA-seq  
217 library preparation was performed using the 10X Genomics Chromium system followed  
218 by 50 PE sequencing on the Illumina Novaseq 6000 platform. In total, we generated  
219 transcriptomic data for 81,267 nuclei, each with more than 500 transcripts derived from  
220 31 groups collected in 5 distinct batches. On average, 2,181 unique molecular

221 identifiers (UMIs) and 992 genes were detected per nucleus with high sequencing depth  
222 (90.3% average sequencing depth) (Figure S1).

223         The snRNA-seq reads were demultiplexed and aligned to the ENSEMBL ce10 *C.*  
224 *elegans* transcriptome to generate gene expression matrices using CellRanger (10x  
225 Genomics) (see supplemental material and methods). To mitigate the inclusion of  
226 debris-contaminated droplets and to correct for ambient RNA contamination, we also  
227 applied DIEM [35] and SoupX [36], respectively. DIEM identifies and removes droplets  
228 containing high levels of extranuclear RNA through modeling semi-supervised  
229 expectation maximization and outperforms other methods in snRNA-seq [35]. We then  
230 combined DIEM with SoupX which models contamination levels of snRNA-seq with  
231 ambient RNA and corrects expression for the remaining droplets. Using these stringent  
232 pipelines, we retained transcriptomic data from 41,750 droplets representing a median  
233 of 1,627 UMIs and 1,007 genes. A total of 31 discrete clusters were identified following  
234 batch/group effect correction by canonical correlation analysis (CCA) in Seurat v3  
235 followed by Louvain clustering algorithm [37,38]. Log-normalized expression levels in t-  
236 distributed stochastic neighbor embedding (t-SNE) plot projections were used to  
237 visualize cell clusters in two dimensions and dot heatmap were used to visualize marker  
238 expression across different cell types (Figure 1B and Figure 2).

239         To facilitate unbiased cluster identification, gene enrichment (FDR<0.05) in each  
240 cluster was used to mine the Tissue enrichment, Gene Ontology, and Phenotype  
241 enrichment modules of WormBase [39] (Figure 1A). The output from these modules  
242 was cross-referenced with *in situ* expression data of the top enriched transcripts using  
243 the Nematode Expression Pattern Database (NEXTDB <https://nematode.nig.ac.jp/>) [40].

244 Comprehensive information for all 31 clusters that include top enriched and depleted  
245 genes, the 3 WormBase modules outputs, and representative examples from NEXTDB  
246 are presented in a dashboard (Supplemental data file 1). Examples are shown in Figure  
247 2 alongside expression values of several known markers of each cell type showing  
248 notably high concordance. For example, cluster 23 is the only cluster showing a high  
249 expression level of the germline-specific transcripts *tra-2* [41], the meiotic-specific  
250 endonuclease *spo-11*, and the synaptonemal complex components *syp-1* and *syp-3* (as  
251 well as *syp-2* and *syp-4* not depicted here) [42,43]. In the adult *C. elegans* germline, the  
252 expression of *tra-2* is restricted to the most distal section of the germline and overlaps  
253 with that of the Notch signaling target *sygl-1* [29,44]. To test whether cluster 23 could  
254 correspond to the distal germline, we confirmed *sygl-1* expression by small molecule  
255 FISH (smFISH) as previously described [29] and compared its expression with its tSNE  
256 distribution (Figure S2). As expected, *sygl-1* showed a high expression level in the  
257 region corresponding to cluster 23 with some expression in other germline clusters  
258 which matched its smFISH distribution and published data [44] indicating that cluster 23  
259 likely corresponds to the distal germline.

260 Similarly, cluster 3 specifically expresses all known markers of the spermatheca  
261 such as *fkh-6*, *ule-3*, *ule-5*, and also *ZK813.7* [45,46]. Marker analyses also revealed  
262 that sub-regionalization within clusters is apparent. For example, the three GABAergic  
263 neuron markers *unc-25*, *unc46*, and *unc-47* [47] resolve in one section of cluster 11  
264 (Figure 2) which also expresses markers of cholinergic neurons (e.g. *cha-1* and *cho-1*)  
265 [48]. Also of note, based on WormBase's TEA analysis, several tissue- and cell- types  
266 are represented by multiple clusters (e.g. the germline represented by 6 clusters, the

267 intestine and epithelial system, represented by 3 cluster each) (Supplemental data file  
268 1) likely reflective of the cellular heterogeneity underlying the composition of those  
269 tissues. Very few clusters (2/31), *i.e.* clusters 0 and 9, showed a lack of concordance  
270 between TEA, GO, and *in situ* data precluding assignment of a clear identity. All  
271 snRNA-seq data can be mined at:  
272 [https://singlecell.broadinstitute.org/single\\_cell/reviewer\\_access/d94dacb1-9ab3-49f4-](https://singlecell.broadinstitute.org/single_cell/reviewer_access/d94dacb1-9ab3-49f4-a5a0-392d8a0399ca)  
273 [a5a0-392d8a0399ca](https://singlecell.broadinstitute.org/single_cell/reviewer_access/d94dacb1-9ab3-49f4-a5a0-392d8a0399ca) (also see data availability section).

274

### 275 **SnRNA-seq reveals broad impacts of inter-generational exposure to ethanol**

276 We first applied snRNA-seq to identify the organism-wide transcriptional outcome  
277 of a parental 48-hour (L4 to end of day 1 of adulthood) exposure to two concentrations  
278 of ethanol (0.05% and 0.5%) or water control on the F1 adult progeny. These doses  
279 were chosen to circumscribe the wide range of human blood alcohol concentrations  
280 associated with low (0.05%) or high alcohol (0.5%) use respectively [49]. We first  
281 compared cell type proportion in the F1 following parental ethanol exposure and  
282 observed that broadly similar cell type distributions were observed across all treatment  
283 conditions (Figure S3). However, we observed a significant number of Differentially  
284 Expressed Genes (DEGs) (FDR<0.05) between treatment conditions (Figure 3A).  
285 Across all F1 clusters from the 0.05% ethanol exposure condition, we identified a total  
286 of 1,223 DEGs, including 583 uniformly upregulated DEGs, 520 uniformly  
287 downregulated DEGs, and 120 DEGs that were differentially up or down regulated in  
288 cluster specific ways (*i.e.* upregulated in some clusters but downregulated in other  
289 clusters) (Table S2). Surprisingly, compared to 0.05%, exposure to the higher ethanol



290 concentration of 0.5% resulted in fewer DEGs identified at the F1 (Table S3) with a total  
291 of 948 DEGs, including 430 uniformly upregulated DEGs, 407 uniformly downregulated  
292 DEGs, and 111 up- and down-regulated DEGs (Figure 3A).

293 Gene Ontology of the union of all DEGs revealed the enrichment of some  
294 functional categories that align with alcohol metabolism such as the GO category  
295 “carboxylic acid metabolic process” driven by the presence in the DEG list of several  
296 aldehyde dehydrogenases (Table 1 and Table S4), which catalyze the final step of  
297 ethanol metabolism from acetaldehyde into acetate. However, a major target of ethanol  
298 across exposure conditions and clusters is the translation machinery as exemplified by  
299 the deregulation of many ribosomal components and representing 5 of the top 10 GO  
300 categories, including the top 3 (Table S4). The inhibition of translation and the  
301 downregulation of genes encoding ribosomal subunits are a well described and  
302 conserved impact of alcohol exposure *in vitro* and in a variety of species from bacteria  
303 to humans [50–55]. In addition, reproductive pathways were amongst the top shared  
304 across exposure conditions at the F1, such as “gamete generation”, “germ cell  
305 development”, and “embryo development ending in birth or egg hatching” pathways  
306 (Table S4).

307

### 308 **SnRNA-seq reveals tissue-specific DEGs from intergenerational (P0 to F1)** 309 **exposure to ethanol**

310 Next, we conducted cluster-specific DEG analysis to investigate cell type specific  
311 effects at the F1. Cluster-resolved DEG analysis indicated clearly distinct transcriptional

312 responses to parental ethanol exposure between cell types. While some genes were  
313 consistently up-regulated (*atp-6*, *nduo-6*) or down-regulated (*vit-5*) across all clusters  
314 between ethanol and water treatment, most DEGs showed cell type-specific restriction  
315 as highlighted by the low overlap of the top DEGs per cluster (Figure S4, Table S2 and  
316 S3). To rank order the F1 clusters by sensitivity to ethanol exposure, we employed a  
317 Euclidean distance analysis [56,57], which estimates the degree of transcriptomic shifts  
318 between exposure and control groups (see Supplemental Material and Methods).  
319 Several clusters (1, 15, and 30) with an assigned germline identity based on  
320 TEA/GO/Phenotype enrichment analyses and NEXTDB (Supplemental File 1) showed  
321 some of the largest degree of transcriptomic shifts at the F1 generation under 0.5%  
322 ethanol exposure condition (Figure 3B). Other cluster categories that appeared most  
323 affected included clusters related to muscle function such as cluster 2 and cluster 17,  
324 both carrying striated muscle cell identity. The degree of transcriptomic shift was much  
325 less pronounced following 0.05% ethanol exposure compared to 0.5% ethanol,  
326 suggesting a dose-dependent transcriptomic response across cell types.

327         We hypothesized that while most DEGs are cell type-specific, genes implicated  
328 in ethanol metabolism may show a more uniform response across clusters. Thus, we  
329 investigated the expression of genes involved in ethanol metabolism, including 3 distinct  
330 alcohol dehydrogenase (*sodh-1*, H24K24.3, ZK829.7) and 10 aldehyde dehydrogenase  
331 (*alh-3*, *-4*, *-7* through *-13*), whose expression was detectable in our datasets (Figure  
332 S5). Contrary to our expectations, of the 13 genes examined, only 5 showed significant  
333 changes in expression (FDR < 0.05) and did so in a cluster- and dose- dependent  
334 fashion. For example, *sodh-1* was upregulated in cluster 13 and cluster 18 under the

335 0.05% exposure condition but was downregulated in cluster 2 and cluster 27 at 0.5%.  
336 Notably, the cell types showing the highest increase in ethanol metabolism genes were  
337 not the cell types that were the least sensitive to ethanol and vice versa, suggesting that  
338 the upregulation of ethanol metabolism genes in the F1 does not protect a tissue from  
339 the inter-generational impact of exposure (compare Figure 3B and S5).

340 At the F1, the majority of the clusters reaching statistical significance (FDR<0.05)  
341 after 0.5% ethanol exposure in our Euclidean Distance analysis displayed a germline  
342 identity, e.g. clusters 1, 12, 15, 23, 30. Thus, we next examined whether reproduction-  
343 related phenotypes were significantly over-represented in our dataset. We analyzed the  
344 top 10 most shared WormBase phenotypes across cell types with significantly altered  
345 Euclidean distance and identified several phenotypic terms related to reproduction (e.g.  
346 “diplotene region organization variant”, “pachytene region organization variant”, “germ  
347 cell compartment expansion variant”) that are mildly upregulated in germline cluster 1  
348 but strongly and uniformly downregulated in germline cluster 12 (Figure 4A). Finally, we  
349 examined whether the DEGs across the sensitive cell types were enriched in specific  
350 phenotypes by comparing the DEGs’ phenotype enrichment outcome with all  
351 WormBase phenotypes. This analysis revealed that our dataset has a significantly  
352 higher proportion of phenotypes related to reproductive system development, cellular  
353 development, and morphology categories among both treatment groups (Figure 4B).

354 Since the germline appears to be a major target for ethanol at the F1 and F3  
355 generations, we validated the magnitude and directionality of the transcriptional impact  
356 of ethanol exposure in that tissue. For example, in our snRNA-seq dataset, *tra-2*  
357 showed a significant downregulation of its expression in cluster 23 in the F1 under 0.5%

358 ethanol exposure (Figure 3D, Table S3, 0.60-fold change, adjusted P value = 0.003).  
359 We performed smFISH in dissected F1 germlines followed by quantification using FISH-  
360 quant (Figure 3F-I). We observed a congruent 0.47-fold downregulation of *tra-2* level  
361 (P<0.05). Conversely, at the F3 under 0.5% ethanol exposure condition, *mex-3* was  
362 significantly upregulated in our snRNA-seq dataset in germline cluster 12 (Figure 3E,  
363 Table S6, 1.58-fold change, adjusted P value = 0.008). Cluster 12 also as a meiotic  
364 germline identity based on GO enrichment (Supplemental file 1). SmFISH indicated an  
365 upregulation of *mex-3* in the mid-pachytene region of F3 *C. elegans* gonads (2.19-fold,  
366 P<0.001).

367 Together, these results indicate a strong intergenerational impact of alcohol in *C.*  
368 *elegans* on a variety of cell types including those that belong to the germline.

369

### 370 **Transgenerational (P0 to F3) impact of ethanol**

371 We extended our snRNA-seq approach to the F3 generation to capture the  
372 transgenerational effect of P0 exposure to ethanol. Similarly to the F1, no overt impact  
373 on cell type distributions was observed (Figure S3). Across all clusters at the F3  
374 stemming from a P0 0.05% ethanol exposure, a total of 798 unique Differentially  
375 Expressed Genes (DEGs), 366 unique upregulated DEGs, 369 unique downregulated  
376 DEGs satisfying an FDR<0.05 and 63 DEGs that were differentially up or down  
377 regulated in cluster specific ways (Figure 3A, Table S5). For 0.5% ethanol, a total of 918  
378 unique Differentially Expressed Genes (DEGs) were identified comprising 402 unique  
379 upregulated DEGs, 422 unique downregulated DEGs satisfying an FDR<0.05 and 94  
380 DEGs that were differentially up or down regulated in cluster specific ways (Figure 3A,

381 Table S6).

382 Gene Ontology analysis of all F3 DEGs revealed the enrichment of some  
383 functional categories that align with alcohol metabolism. These were exemplified by GO  
384 categories such as “carboxylic acid metabolic process”, “drug metabolic process”, and  
385 “small molecule catabolic process” driven in part by the presence in our DEG list of  
386 alcohol dehydrogenase genes, *sodh-1* and *hphd-1*, which catalyze the first step of  
387 ethanol metabolism from ethanol to acetaldehyde, as well as aldehyde dehydrogenase  
388 genes, *alh-8* and *alh-13*, which catalyzes the second step of ethanol metabolism from  
389 acetaldehyde into acetate, in both exposure groups as compared to water at the F3  
390 (Table 1 and Table S4). Other highly enriched GO terms were “structural molecule  
391 activity”, “cytoskeleton organization”, “translation” and reproductive GO categories  
392 “embryo development ending in birth or egg hatching” and “sexual reproduction”.

393

### 394 **Cell type-specific transgenerational response to ethanol**

395 Next, we conducted cluster specific DEG analysis to investigate ethanol’s  
396 transgenerational effects. While the majority of top DEGs at the F1 were up-regulated,  
397 in comparison, the majority of the top DEGs found at the F3 were down-regulated,  
398 especially at the 0.5% ethanol exposure condition (Figure S6). These top DEGs showed  
399 remarkable cell type specificity as highlighted by their low overlap across clusters. We  
400 assessed the sensitivity of individual clusters by measuring their Euclidean distance  
401 (Figure 3C). Notably, compared to the F1 results, more clusters reached the cut-off of  
402  $FDR < 0.05$  from 0.5% exposure at the F3. While changes in the relative order of the  
403 clusters were observed between F3 and F1, several germline clusters showed some of

404 the largest transcriptomic shifts including cluster 1 which remained the cluster the most  
405 transcriptionally affected by ethanol (Figure 3C).

406 The examination of F3 DEGs through the WormBase phenotype enrichment tool  
407 revealed a strong alteration of different phenotypes under the 0.5% ethanol exposure  
408 condition, albeit in a less uniform fashion across clusters (Figure 4C,D). The phenotype  
409 pachytene region organization variant was downregulated in cluster 1 but not in other  
410 germline clusters, suggesting a lasting but weakened impact of ethanol exposure effect  
411 at the F3. A comparison of phenotype proportion between our dataset and all  
412 phenotypes, revealed a persistent enrichment in the F3 of the phenotypic categories  
413 described in the F1 including a higher proportion of reproductive system development  
414 variant at 0.5% ethanol. By contrast to the F1, no phenotypic category reached  
415 significance under the 0.05% ethanol exposure condition, confirming the weakened  
416 impact of ethanol at the F3.

417

### 418 **Functional outcomes of ethanol's inter- and trans- generational transcriptional** 419 **impacts.**

420 The presence of several germline clusters amongst the most transcriptionally  
421 impacted clusters as well as the enrichment of some reproductive phenotypes at the F1  
422 and F3 suggested that ethanol exposure may have a significant functional impact on  
423 reproduction at these generations. To test this hypothesis, we measured three  
424 hallmarks of reproductive health in *C. elegans*: germline apoptosis by acridine orange  
425 staining [32], the proper segregation of chromosomes during meiosis by monitoring the  
426 segregation of the X chromosome [58], and the viability of produced embryos through

427 plate phenotyping [33,59]. All three reproductive measures were significantly  
428 upregulated at either 0.05% or 0.5% ethanol exposures in the F1 and in the F3  
429 compared to the water control, remarkably, with no consistent dose-response  
430 relationship (Figure 5). Analysis of germline apoptosis through acridine orange staining  
431 revealed a 2-fold increase in the number of apoptotic nuclei per gonad in F1 worms who  
432 were exposed to 0.05% ethanol at the P0 (N=5, P<0.05) and a 2.7-fold increase in  
433 those who were exposed to 0.50% ethanol (N=5, P<0.0001) when compared to water.  
434 Similarly, at the F3, a 1.9-fold increase for both ethanol exposure conditions was  
435 observed when compared to water (N=4-5, P<0.001). Next, we monitored chromosome  
436 segregation through the segregation of the X chromosome using a strain carrying the  
437 *Pxol-1::gfp* reporter [31,58]. Chromosomes that fail to properly segregate during meiosis  
438 result in embryos with aneuploidies [43]. Here, we monitored aneuploidy *via* the  
439 incidence of male (XO) embryos which are caused by mis-segregation of the X-  
440 chromosome and marked by the expression of the male-specific *xol-1* promoter driving  
441 GFP. Analysis at the F1 identified a significant increase in the incidence of GFP-positive  
442 embryos for both ethanol exposure conditions when compared to water with a 2.6-fold  
443 increase in the proportion of worms with at least one GFP-positive embryo at 0.05%  
444 ethanol exposure (N=6-7, P<0.01) and a 2.8-fold increase at 0.50% ethanol exposure  
445 (N=6-7, P<0.01). The incidence of GFP-positive embryos further increased at the F3  
446 with a 4-fold increase at 0.05% ethanol exposure (N=6-7, P<0.01) and a 4.3-fold  
447 increase at 0.50% ethanol exposure (N=6-7, P<0.001). Together, these results indicate  
448 a profound impact of inter- and trans-generational alcohol exposure on the nematode's  
449 reproductive function congruent with the outcome of our snRNA-seq analysis.

450

## 451 **DISCUSSION**

452           We performed single-nucleus RNA-seq approach in the adult *C. elegans*  
453 nematode and identified a large number of transcriptionally distinct cell types. By  
454 applying this approach to the study of the inter- and trans-generational impacts of  
455 ethanol exposure, we also demonstrate its utility in achieving a nuanced understanding  
456 of transcriptional responses to environmental cues.

457           We circumvented some of the drawbacks associated with single nucleus  
458 approaches by employing multiple data clean-up pipelines to identify and remove  
459 debris-contaminated droplets and spurious signal from ambient RNA, a common artifact  
460 of snRNA-seq [35,36]. This stringent approach removed approximately half of all  
461 droplets but still generated a robust number of UMI and genes per nucleus when  
462 compared with other studies [60]. Our approach also generated a larger number of  
463 clusters corresponding to cell types previously under-represented in single cell RNA-seq  
464 studies in *C. elegans* because of their lack of cellularization, e.g. meiotic stages of the  
465 germline and hypodermal cells.

466           Our approach nonetheless has several limitations. By working in a *fog-1* mutant  
467 background, we were not able to identify sperm cells, highlighted by the absence of  
468 expression of canonical sperm markers in our dataset. This was considered a  
469 necessary trade-off to avoid the production of embryos and the crowding of snRNA-seq  
470 data with a large and diverse number of embryonic cell types. While it is possible that  
471 *fog-1*'s absence alters the transcriptional landscape of the germline, *fog-1(q253)* was  
472 chosen specifically because of the normal morphology and staging of the hermaphrodite



473 germline in the *fog-1* mutant background [34]. Secondly, for a small number of clusters,  
474 tissue enrichment analysis did not delineate a clear cell type identity (2/31 clusters)  
475 either representing cell types with mixed identities or cell types for which other  
476 clustering methods would be beneficial. Nonetheless, the large majority of clusters bore  
477 a distinctive tissue identity not only corroborated by GO and phenotype enrichment  
478 analyses but also by the tissue-specific *in situ* expression pattern of genes showing the  
479 highest degree of cluster specificity.

480         The application of our snRNA-seq approach to the study of ethanol's response  
481 across generations highlighted the complexity of organisms' response to environmental  
482 cues. This aspect was exemplified by the diversity and specificity of GO categories by  
483 clusters (Table S4) and by the low degree of overlap of top DEGs between clusters  
484 (Figure S4 and S6). Because of their high ranking in the Euclidean analysis in both F1  
485 and F3 generations, several tissue types stood out as being particularly affected by  
486 ethanol: the muscle system, neurons, and the germline. The direct impact of alcohol on  
487 skeletal and cardiac muscle cells is well described and a common outcome of chronic  
488 alcohol use [61–63]. An intergenerational effect of prenatal alcohol exposure on the  
489 musculature and muscle function has also been demonstrated and is referred to as fetal  
490 alcohol myopathy [64,65]. Interestingly, a proposed mechanism for this induced muscle  
491 cell dysfunction is an alteration of protein synthesis [66,67] which is represented by  
492 several GO categories (e.g. “peptide metabolic process”, “peptide biosynthetic process”,  
493 “translation”) in our DEG pathway analysis (Table S4). Supplementation of amino acids  
494 to facilitate translation processes might be tested as a method of improving the impact  
495 of ethanol on the F1 muscle cells. The mechanisms of transgenerational impact of

496 alcohol on F3 musculature, however, is unclear and has not been previously described.

497         Similarly, cluster 11 which comprises GABAergic (e.g. *unc-25<sup>+</sup>*) and some  
498 cholinergic neurons (e.g. *cha-1<sup>+</sup>*) is also identified as being significantly altered by 0.5%  
499 ethanol at the F1 and F2. Interestingly, GABAergic neurons are also a well-known target  
500 of direct and intergenerational alcohol exposure in which alcohol leads to over  
501 stimulation of the GABA system leading to dampening of neuronal excitability [68–71].  
502 To a lesser extent, cholinergic signaling has also been implicated in the  
503 intergenerational impact of ethanol on the nervous system [72–74]. Since in *C. elegans*,  
504 direct alcohol exposure is associated with a deregulation of cholinergic signaling and  
505 locomotory behavior [16,75], it will be important to also investigate the role of GABA  
506 signaling and its interaction with cholinergic signaling in regulating locomotion not only  
507 in a direct exposure paradigm but also across generations.

508         Germline clusters were ranked the highest in the Euclidean distance analysis at  
509 the F1 and F3 generations. We therefore focused our validation experiments on the  
510 germline and reproduction. Direct ethanol exposure has been known to cause  
511 aneuploidy in mammalian germ cells for many years [76–78], however whether these  
512 effects extend to the F1's germline has remained uncertain. Our results clearly indicate  
513 that in *C. elegans*, both low and high concentrations of ethanol have a profound impact  
514 on reproductive function (germ cell apoptosis, aneuploidy, embryonic lethality) and that  
515 these impacts extend transgenerationally. We have recently demonstrated that the  
516 transgenerational reproductive effects of the environmental chemical Bisphenol A  
517 requires the alteration of the repressive histone marks H3K9me3 and H3K27me3  
518 [23,25]. Intergenerational alcohol exposure, on the other hand, has been shown to lead

519 to histone hyperacetylation through the metabolism of ethanol into acetate [79]. Thus, it  
520 is plausible that alcohol's inter- and trans-generational outcomes described here may be  
521 initiated by the over-acetylation of histone in the germline. Finally, while we validated  
522 ethanol's impacts on several DEGs by smFISH in the germline, a more comprehensive  
523 DEG validation in other tissues will be needed as well as comparison with cell type-  
524 specific intergenerational and transgenerational ethanol transcriptional outcome in  
525 mammalian models when such data becomes available.

526 Together, the application of snRNA-seq to the adult *C. elegans* represents a  
527 powerful approach for the comprehensive identification of cell types in the nematode  
528 and for probing the transcriptional impact of physiological and environmental changes.

529

## 530 **DATA AVAILABILITY**

531 All raw data is accessible on NCBI's Gene Expression Omnibus (GEO), at:

532 <https://www.ncbi.nlm.nih.gov/geo/query/acc.cgi?acc=GSE208229>

533

534 The data is also available through the Broad Single Cell Portal:

535 [https://singlecell.broadinstitute.org/single\\_cell/study/SCP922/single-nucleus-resolution-](https://singlecell.broadinstitute.org/single_cell/study/SCP922/single-nucleus-resolution-mapping-of-the-adult-c-elegans-and-its-application-to-elucidate-inter-and-trans-generational-response-to-alcohol)  
536 [mapping-of-the-adult-c-elegans-and-its-application-to-elucidate-inter-and-trans-](https://singlecell.broadinstitute.org/single_cell/study/SCP922/single-nucleus-resolution-mapping-of-the-adult-c-elegans-and-its-application-to-elucidate-inter-and-trans-generational-response-to-alcohol)  
537 [generational-response-to-alcohol](https://singlecell.broadinstitute.org/single_cell/study/SCP922/single-nucleus-resolution-mapping-of-the-adult-c-elegans-and-its-application-to-elucidate-inter-and-trans-generational-response-to-alcohol)

538

## 539 **ACKNOWLEDGEMENTS**

540 The authors would like to thank Doug Arneson for input on single-nucleus sequencing  
541 parameters; Ingrid Cely, In Sook Ahn, and Graciela Diamante for discussions and

542 trouble-shooting advice; Eyal Ben David for advice on single-cell/nuclei dissociation  
543 methods; Jessica Scholes, Jeffrey Calim, Felicia Codrea, and Salem Haile for guidance  
544 with single-nucleus cytometry; Michael Mashock and Marco De Simone for their library  
545 preparation and sequencing expertise. Matteo Pellegrini for advice and input on data  
546 analysis. We thank Judith Kimble, Tina Lynch, and Sarah Crittenden for advice on  
547 smFISH and providing the *sygl-1* probe. The *Caenorhabditis* Genetics Center (CGC)  
548 provided the strains used in this study. We thank Yuji Kohara for permission to use  
549 NEXTDB *in situ* data.

550

## 551 **FUNDING**

552 LT is supported by the NIH Training Grant in Genomic Analysis and Interpretation T32  
553 HG002536; YWC is supported by the UCLA Eureka fellowship and Burroughs  
554 Wellcome Fund Inter-school Training Program in Chronic Diseases; PA is supported by  
555 NIEHS R01 ES027487, NIAAA R21 AA024889, the John Templeton Foundation, and  
556 the Burroughs Wellcome Innovation in Regulatory Science Award. EDVB and PWS are  
557 supported by U24HG002223.

558

## 559 **REFERENCES**

- 560 1. Denny L, Coles S, Blitz R. Fetal alcohol syndrome and fetal alcohol spectrum  
561 disorders. *Am Fam Physician* [Internet]. 2017 Oct 15 [cited 2022 Jul 7];96(8):515–  
562 22 PMID29094891. Available from:  
563 <https://www.aafp.org/pubs/afp/issues/2017/1015/p515.html>
- 564 2. Caputo C, Wood E, Jabbour L. Impact of fetal alcohol exposure on body systems: A  
565 systematic review [Internet]. Vol. 108, *Birth Defects Research Part C - Embryo*  
566 *Today: Reviews*. 2016.108(2):174–80 PMID27297122. Available from:  
567 <http://dx.doi.org/10.1002/bdrc.21129>

- 568 3. La Vignera S, Condorelli RA, Balercia G, Vicari E, Calogero AE. Does alcohol have  
569 any effect on male reproductive function? A review of literature [Internet]. Vol. 15,  
570 Asian Journal of Andrology. 2013.15(2):221–5 PMID23274392. Available from:  
571 <http://dx.doi.org/10.1038/aja.2012.118>
- 572 4. Strategic plan 2017-2021 [Internet]. [cited 2022 Jul 7]. Available from:  
573 <https://www.niaaa.nih.gov/strategic-plan>
- 574 5. Abbott CW, Rohac DJ, Bottom RT, Patadia S, Huffman KJ. Prenatal Ethanol  
575 Exposure and Neocortical Development: A Transgenerational Model of FASD.  
576 Cereb Cortex [Internet]. 2018;28(8):2908–21 PMID29106518. Available from:  
577 <https://www.ncbi.nlm.nih.gov/pubmed/29106518>
- 578 6. Bozler J, Kacsóh BZ, Bosco G. Transgenerational inheritance of ethanol preference  
579 is caused by maternal NPF repression. Elife [Internet]. 2019 Jul 9;8:e45391  
580 PMID31287057PMC6615861. Available from:  
581 <https://elifesciences.org/articles/45391>
- 582 7. Gangisetty O, Palagani A, Sarkar DK. Transgenerational inheritance of fetal alcohol  
583 exposure adverse effects on immune gene interferon- $\gamma$ . Clin Epigenetics [Internet].  
584 2020 May 24;12(1):70 PMID32448218PMC7245772. Available from:  
585 <http://dx.doi.org/10.1186/s13148-020-00859-9>
- 586 8. Bottom RT, Kozanian OO, Rohac DJ, Erickson MA, Huffman KJ. Transgenerational  
587 effects of prenatal ethanol exposure in prepubescent mice. Front Cell Dev Biol  
588 [Internet]. 2022 Mar 21;10:812429 PMID35386207PMC8978834. Available from:  
589 <http://dx.doi.org/10.3389/fcell.2022.812429>
- 590 9. Nizhnikov ME, Popoola DO, Cameron NM. Transgenerational Transmission of the  
591 Effect of Gestational Ethanol Exposure on Ethanol Use-Related Behavior. Alcohol  
592 Clin Exp Res [Internet]. 2016;40(3):497–506 PMID26876534. Available from:  
593 <http://dx.doi.org/10.1111/acer.12978>
- 594 10. Hollander J, McNivens M, Pautassi RM, Nizhnikov ME. Offspring of male rats  
595 exposed to binge alcohol exhibit heightened ethanol intake at infancy and  
596 alterations in T-maze performance. Alcohol [Internet]. 2019;76:65–71  
597 PMID30583252. Available from: <http://dx.doi.org/10.1016/j.alcohol.2018.07.013>
- 598 11. Lam MKP, Homewood J, Taylor AJ, Mazurski EJ. Second generation effects of  
599 maternal alcohol consumption during pregnancy in rats. Prog  
600 Neuropsychopharmacol Biol Psychiatry [Internet]. 2000;24(4):619–31  
601 PMID10958155. Available from: [http://dx.doi.org/10.1016/S0278-5846\(00\)00097-X](http://dx.doi.org/10.1016/S0278-5846(00)00097-X)
- 602 12. Yohn NL, Bartolomei MS, Blendy JA. Multigenerational and transgenerational  
603 inheritance of drug exposure: The effects of alcohol, opiates, cocaine, marijuana,  
604 and nicotine [Internet]. Vol. 118, Progress in Biophysics and Molecular Biology.  
605 2015.118(1–2):21–33 PMID25839742. Available from:  
606 <http://dx.doi.org/10.1016/j.pbiomolbio.2015.03.002>

- 607 13. Patten AR, Fontaine CJ, Christie BR. A comparison of the different animal models  
608 of fetal alcohol spectrum disorders and their use in studying complex behaviors  
609 [Internet]. Vol. 2, *Frontiers in Pediatrics*. 2014.2(SEP). Available from:  
610 <http://dx.doi.org/10.3389/fped.2014.00093>
- 611 14. Mitchell PH, Bull K, Glautier S, Hopper NA, Holden-Dye L, O'Connor V. The  
612 concentration-dependent effects of ethanol on *Caenorhabditis elegans* behaviour.  
613 *Pharmacogenomics J* [Internet]. 2007 Dec;7(6):411–7 PMID17325734. Available  
614 from: <http://dx.doi.org/10.1038/sj.tpj.6500440>
- 615 15. Lee J, Jee C, McIntire SL. Ethanol preference in *C. elegans*. *Genes Brain Behav*  
616 [Internet]. 2009;8(6):578–85 PMID19614755. Available from:  
617 <http://dx.doi.org/10.1111/j.1601-183X.2009.00513.x>
- 618 16. McIntire SL. Ethanol [Internet]. *WormBook : the online review of C. elegans biology*.  
619 2010.:1–6 PMID20432508. Available from:  
620 <http://dx.doi.org/10.1895/wormbook.1.40.1>
- 621 17. Topper SM, Aguilar SC, Topper VY, Elbel E, Pierce-Shimomura JT. Alcohol  
622 disinhibition of behaviors in *C. elegans*. *PLoS One* [Internet]. 2014;9(3)  
623 PMID24681782. Available from: <http://dx.doi.org/10.1371/journal.pone.0092965>
- 624 18. Pandey P, Singh A, Kaur H, Ghosh-Roy A, Babu K. Increased dopaminergic  
625 neurotransmission results in ethanol dependent sedative behaviors in  
626 *Caenorhabditis elegans*. *PLoS Genet* [Internet]. 2021;17(2):e1009346  
627 PMID33524034. Available from: <http://dx.doi.org/10.1371/journal.pgen.1009346>
- 628 19. Alaimo JT, Davis SJ, Song SS, Burnette CR, Grotewiel M, Shelton KL, et al.  
629 Ethanol Metabolism and Osmolarity Modify Behavioral Responses to Ethanol in *C.*  
630 *elegans*. *Alcohol Clin Exp Res* [Internet]. 2012;36(11):1840–50 PMID22486589.  
631 Available from: <http://dx.doi.org/10.1111/j.1530-0277.2012.01799.x>
- 632 20. Cao J, Packer JS, Ramani V, Cusanovich DA, Huynh C, Daza R, et al.  
633 Comprehensive single-cell transcriptional profiling of a multicellular organism.  
634 *Science* [Internet]. 2017;357(6352):661–7 PMID28818938. Available from:  
635 <http://dx.doi.org/10.1126/science.aam8940>
- 636 21. Packer JS, Zhu Q, Huynh C, Sivaramakrishnan P, Preston E, Dueck H, et al. A  
637 lineage-resolved molecular atlas of *C. Elegans* embryogenesis at single-cell  
638 resolution. *Science* [Internet]. 2019;365(6459) PMID31488706. Available from:  
639 <http://dx.doi.org/10.1126/science.aax1971>
- 640 22. Taylor SR, Santpere G, Weinreb A, Barrett A, Reilly MB, Xu C, et al. Molecular  
641 topography of an entire nervous system. *Cell* [Internet]. 2021 Aug 5;184(16):4329-  
642 4347.e23 PMID34237253PMC8710130. Available from:  
643 <http://dx.doi.org/10.1016/j.cell.2021.06.023>
- 644 23. Camacho J, Allard P. Histone Modifications: Epigenetic Mediators of Environmental



- 645 Exposure Memory. Epigenetics Insights. 2018;11.
- 646 24. Weinhouse C, Truong L, Meyer JN, Allard P. *Caenorhabditis elegans* as an  
647 emerging model system in environmental epigenetics. *Environ Mol Mutagen*  
648 [Internet]. 2018;59(7):560–75 PMID30091255. Available from:  
649 <http://dx.doi.org/10.1002/em.22203>
- 650 25. Camacho J, Truong L, Kurt Z, Chen Y-W, Morselli M, Gutierrez G, et al. The  
651 Memory of Environmental Chemical Exposure in *C. elegans* Is Dependent on the  
652 Jumonji Demethylases *jmjd-2* and *jmjd-3/utx-1*. *Cell Rep* [Internet]. 2018 May  
653 22;23(8):2392–404 PMID29791850PMC6003705. Available from:  
654 <http://dx.doi.org/10.1016/j.celrep.2018.04.078>
- 655 26. Kelly WG. Transgenerational epigenetics in the germline cycle of *Caenorhabditis*  
656 *elegans*. *Epigenetics Chromatin* [Internet]. 2014;7(1):6 PMID24678826. Available  
657 from: <http://dx.doi.org/10.1186/1756-8935-7-6>
- 658 27. Kishimoto S, Uno M, Okabe E, Nono M, Nishida E. Environmental stresses induce  
659 transgenerationally inheritable survival advantages via germline-to-soma  
660 communication in *Caenorhabditis elegans*. *Nat Commun* [Internet]. 2017;8:14031  
661 PMID28067237. Available from: <https://www.ncbi.nlm.nih.gov/pubmed/28067237>
- 662 28. Klosin A, Casas E, Hidalgo-Carcedo C, Vavouri T, Lehner B. Transgenerational  
663 transmission of environmental information in *C. elegans*. *Science* [Internet].  
664 2017;356(6335):320–3 PMID28428426. Available from:  
665 <https://www.ncbi.nlm.nih.gov/pubmed/28428426>
- 666 29. Lee C, Seidel HS, Lynch TR, Sorensen EB, Crittenden SL, Kimble J. Single-  
667 molecule RNA Fluorescence in situ Hybridization (smFISH) in *Caenorhabditis*  
668 *elegans*. *Bio Protoc* [Internet]. 2017 Jun 20;7(12):e2357  
669 PMID34541104PMC8410355. Available from:  
670 <http://dx.doi.org/10.21769/BioProtoc.2357>
- 671 30. Mueller F, Senecal A, Tantale K, Marie-Nelly H, Ly N, Collin O, et al. FISH-quant:  
672 automatic counting of transcripts in 3D FISH images. *Nat Methods* [Internet]. 2013  
673 Apr 28 [cited 2022 Jul 10];10(4):277–8 PMID23538861. Available from:  
674 <https://www.nature.com/articles/nmeth.2406>
- 675 31. Allard P, Kleinstreuer NC, Knudsen TB, Colaiacovo MP. A Screening Platform for  
676 the Rapid Assessment of Chemical Disruption of Germline Function. *Environ Health*  
677 *Perspect* [Internet]. 2013;2013/04/23 PMID23603051. Available from:  
678 <http://dx.doi.org/10.1289/ehp.1206301>
- 679 32. Gartner A, Boag PR, Blackwell TK. Germline survival and apoptosis [Internet].  
680 WormBook : the online review of *C. elegans* biology. 2008.:1–20 PMID18781708.  
681 Available from: <http://dx.doi.org/10.1895/wormbook.1.145.1>
- 682 33. Chen Y, Shu L, Qiu Z, Lee DY, Settle SJ, Que Hee S, et al. Exposure to the BPA-

- 683 Substitute Bisphenol S Causes Unique Alterations of Germline Function. PLoS  
684 Genet [Internet]. 2016;12(7) PMID27472198. Available from:  
685 <http://dx.doi.org/10.1371/journal.pgen.1006223>
- 686 34. Barton MK, Kimble J. fog-1, a regulatory gene required for specification of  
687 spermatogenesis in the germ line of *Caenorhabditis elegans*. Genetics. 1990;
- 688 35. Alvarez M, Rahmani E, Jew B, Garske KM, Miao Z, Benhammou JN, et al.  
689 Enhancing droplet-based single-nucleus RNA-seq resolution using the semi-  
690 supervised machine learning classifier DIEM. Sci Rep [Internet]. 2020;  
691 PMID32620816. Available from: <http://dx.doi.org/10.1038/s41598-020-67513-5>
- 692 36. Young MD, Behjati S. SoupX removes ambient RNA contamination from droplet-  
693 based single-cell RNA sequencing data. Gigascience [Internet]. 2020;  
694 PMID33367645. Available from: <http://dx.doi.org/10.1093/gigascience/giaa151>
- 695 37. Stuart T, Butler A, Hoffman P, Hafemeister C, Papalexi E, Mauck WM, et al.  
696 Comprehensive Integration of Single-Cell Data. Cell [Internet]. 2019;  
697 PMID31178118. Available from: <http://dx.doi.org/10.1016/j.cell.2019.05.031>
- 698 38. Waltman L, Van Eck NJ. A smart local moving algorithm for large-scale modularity-  
699 based community detection. European Physical Journal B [Internet]. 2013;  
700 Available from: <http://dx.doi.org/10.1140/epjb/e2013-40829-0>
- 701 39. Angeles-Albores D, N Lee RY, Chan J, Sternberg PW. Tissue enrichment analysis  
702 for *C. elegans* genomics. BMC Bioinformatics [Internet]. 2016 Sep 13;17(1):366  
703 PMID27618863PMC5020436. Available from: <http://dx.doi.org/10.1186/s12859-016-1229-9>
- 704
- 705 40. [cited 2021 Nov 8]. Available from: <http://nematode.lab.nig.ac.jp/>
- 706 41. Hu S, Skelly LE, Kaymak E, Freeberg L, Lo T-W, Kuersten S, et al. Multi-modal  
707 regulation of *C. elegans* hermaphrodite spermatogenesis by the GLD-1-FOG-2  
708 complex. Dev Biol [Internet]. 2019 Feb 15;446(2):193–205 PMID30599151.  
709 Available from:  
710 <https://www.sciencedirect.com/science/article/pii/S0012160618301866>
- 711 42. Dernburg AF, McDonald K, Moulder G, Barstead R, Dresser M, Villeneuve AM.  
712 Meiotic recombination in *C. elegans* initiates by a conserved mechanism and is  
713 dispensable for homologous chromosome synapsis. Cell [Internet]. 1998;94(3):387–  
714 98 PMID9708740. Available from: [http://dx.doi.org/10.1016/S0092-8674\(00\)81481-6](http://dx.doi.org/10.1016/S0092-8674(00)81481-6)
- 715
- 716 43. Colaiacovo MP. The many facets of SC function during *C. elegans* meiosis.  
717 Chromosoma [Internet]. 2006 Jun;115(3):195–211. Available from:  
718 [http://www.ncbi.nlm.nih.gov/entrez/query.fcgi?cmd=Retrieve&db=PubMed&dopt=Citation&list\\_uids=16555015](http://www.ncbi.nlm.nih.gov/entrez/query.fcgi?cmd=Retrieve&db=PubMed&dopt=Citation&list_uids=16555015)
- 719



- 720 44. Shin H, Haupt KA, Kershner AM, Kroll-Conner P, Wickens M, Kimble J. SYGL-1  
721 and LST-1 link niche signaling to PUF RNA repression for stem cell maintenance in  
722 *Caenorhabditis elegans*. *PLoS Genet* [Internet]. 2017 Dec;13(12):e1007121  
723 PMID29232700PMC5741267. Available from:  
724 <http://dx.doi.org/10.1371/journal.pgen.1007121>
- 725 45. Gissendanner CR, Kelley K, Nguyen TQ, Hoener MC, Sluder AE, Maina CV. The  
726 *Caenorhabditis elegans* NR4A nuclear receptor is required for spermatheca  
727 morphogenesis. *Dev Biol* [Internet]. 2008 Jan 15;313(2):767–86  
728 PMID18096150PMC3845373. Available from:  
729 <http://dx.doi.org/10.1016/j.ydbio.2007.11.014>
- 730 46. Kalis AK, Kroetz MB, Larson KM, Zarkower D. Functional genomic identification of  
731 genes required for male gonadal differentiation in *Caenorhabditis elegans*. *Genetics*  
732 [Internet]. 2010 Jun 1 [cited 2022 Jul 9];185(2):523–35  
733 PMID20308279PMC2881134. Available from:  
734 <https://academic.oup.com/genetics/article/185/2/523/6096927>
- 735 47. Jorgensen EM. GABA. *WormBook* [Internet]. 2005 Aug 31;1–13  
736 PMID18050397PMC4781266. Available from:  
737 <http://dx.doi.org/10.1895/wormbook.1.14.1>
- 738 48. Rand JB. Acetylcholine. *WormBook* [Internet]. 2007 Jan 30;1–21  
739 PMID18050502PMC4781110. Available from:  
740 <http://dx.doi.org/10.1895/wormbook.1.131.1>
- 741 49. Martinez-Hurtado J, Calo-Fernandez B, Vazquez-Padin J. Preventing and Mitigating  
742 Alcohol Toxicity: A Review on Protective Substances. *Beverages* [Internet].  
743 2018;4(2):39. Available from: <http://dx.doi.org/10.3390/beverages4020039>
- 744 50. David ET, Fischer I, Moldave K. Studies on the effect of ethanol on eukaryotic  
745 protein synthesis in vitro. *J Biol Chem* [Internet]. 1983 Jun 25;258(12):7702–6  
746 PMID6553051. Available from: [http://dx.doi.org/10.1016/s0021-9258\(18\)32236-1](http://dx.doi.org/10.1016/s0021-9258(18)32236-1)
- 747 51. Cahill A, Baio DL, Ivester P, Cunningham CC. Differential effects of chronic ethanol  
748 consumption on hepatic mitochondrial and cytoplasmic ribosomes. *Alcohol Clin Exp*  
749 *Res* [Internet]. 1996 Nov;20(8):1362–7 PMID8947311. Available from:  
750 <http://dx.doi.org/10.1111/j.1530-0277.1996.tb01135.x>
- 751 52. Vary TC, Lynch CJ, Lang CH. Effects of chronic alcohol consumption on regulation  
752 of myocardial protein synthesis. *Am J Physiol Heart Circ Physiol* [Internet]. 2001  
753 Sep;281(3):H1242-51 PMID11514293. Available from:  
754 <http://dx.doi.org/10.1152/ajpheart.2001.281.3.H1242>
- 755 53. Karinch AM, Martin JH, Vary TC. Acute and chronic ethanol consumption  
756 differentially impact pathways limiting hepatic protein synthesis. *Am J Physiol*  
757 *Endocrinol Metab* [Internet]. 2008 Jul;295(1):E3-9 PMID18334613PMC2493597.  
758 Available from: <http://dx.doi.org/10.1152/ajpendo.00026.2008>

- 759 54. Haft RJF, Keating DH, Schwaegler T, Schwalbach MS, Vinokur J, Tremaine M, et  
760 al. Correcting direct effects of ethanol on translation and transcription machinery  
761 confers ethanol tolerance in bacteria. *Proc Natl Acad Sci U S A* [Internet]. 2014 Jun  
762 24;111(25):E2576-85 PMID24927582PMC4078849. Available from:  
763 <http://dx.doi.org/10.1073/pnas.1401853111>
- 764 55. Berres ME, Garic A, Flentke GR, Smith SM. Transcriptome profiling identifies  
765 ribosome biogenesis as a target of alcohol teratogenicity and vulnerability during  
766 early embryogenesis. *PLoS One* [Internet]. 2017 Jan 3;12(1):e0169351  
767 PMID28046103PMC5207668. Available from:  
768 <http://dx.doi.org/10.1371/journal.pone.0169351>
- 769 56. Arneson D, Zhang G, Ying Z, Zhuang Y, Byun HR, Ahn IS, et al. Single cell  
770 molecular alterations reveal target cells and pathways of concussive brain injury.  
771 *Nat Commun* [Internet]. 2018;9(1) PMID30254269. Available from:  
772 <http://dx.doi.org/10.1038/s41467-018-06222-0>
- 773 57. Liu W, Venugopal S, Majid S, Ahn IS, Diamante G, Hong J, et al. Single-cell RNA-  
774 seq analysis of the brainstem of mutant SOD1 mice reveals perturbed cell types  
775 and pathways of amyotrophic lateral sclerosis. *Neurobiol Dis* [Internet]. 2020;141  
776 PMID32360664. Available from: <http://dx.doi.org/10.1016/j.nbd.2020.104877>
- 777 58. Nicoll M, Akerib CC, Meyer BJ. X-chromosome-counting mechanisms that  
778 determine nematode sex. *Nature* [Internet]. 1997;388(6638):200–4. Available from:  
779 [http://www.ncbi.nlm.nih.gov/entrez/query.fcgi?cmd=Retrieve&db=PubMed&dopt=Cit](http://www.ncbi.nlm.nih.gov/entrez/query.fcgi?cmd=Retrieve&db=PubMed&dopt=Citation&list_uids=9217163)  
780 [ation&list\\_uids=9217163](http://www.ncbi.nlm.nih.gov/entrez/query.fcgi?cmd=Retrieve&db=PubMed&dopt=Citation&list_uids=9217163)
- 781 59. MacQueen AJ, Colaiacovo MP, McDonald K, Villeneuve AM. Synapsis-dependent  
782 and -independent mechanisms stabilize homolog pairing during meiotic prophase in  
783 *C. elegans*. *Genes Dev* [Internet]. 2002;16(18):2428–42. Available from:  
784 [http://www.ncbi.nlm.nih.gov/entrez/query.fcgi?cmd=Retrieve&db=PubMed&dopt=Cit](http://www.ncbi.nlm.nih.gov/entrez/query.fcgi?cmd=Retrieve&db=PubMed&dopt=Citation&list_uids=12231631)  
785 [ation&list\\_uids=12231631](http://www.ncbi.nlm.nih.gov/entrez/query.fcgi?cmd=Retrieve&db=PubMed&dopt=Citation&list_uids=12231631)
- 786 60. Selewa A, Dohn R, Eckart H, Lozano S, Xie B, Gauchat E, et al. Systematic  
787 Comparison of High-throughput Single-Cell and Single-Nucleus Transcriptomes  
788 during Cardiomyocyte Differentiation. *Scientific Reports* [Internet]. 2020; Available  
789 from: <http://dx.doi.org/10.1038/s41598-020-58327-6>
- 790 61. Urbano-Marquez A, Estruch R, Navarro-Lopez F, Grau JM, Mont L, Rubin E. The  
791 effects of alcoholism on skeletal and cardiac muscle. *N Engl J Med* [Internet]. 1989  
792 Feb 16;320(7):409–15 PMID2913506. Available from:  
793 <http://dx.doi.org/10.1056/NEJM198902163200701>
- 794 62. Meehan J, Piano MR, Solaro RJ, Kennedy JM. Heavy long-term ethanol  
795 consumption induces an alpha- to beta-myosin heavy chain isoform transition in rat.  
796 *Basic Res Cardiol* [Internet]. 1999 Dec;94(6):481–8 PMID10651160. Available from:  
797 <http://dx.doi.org/10.1007/s003950050164>

- 798 63. Hunter RJ, Neagoe C, Järveläinen HA, Martin CR, Lindros KO, Linke WA, et al.  
799 Alcohol affects the skeletal muscle proteins, titin and nebulin in male and female  
800 rats. *J Nutr* [Internet]. 2003 Apr 1 [cited 2022 Jul 11];133(4):1154–7. Available from:  
801 <https://academic.oup.com/jn/article/133/4/1154/4688261>
- 802 64. David P, Subramaniam K. Prenatal alcohol exposure and early postnatal changes  
803 in the developing nerve-muscle system. *Birth Defects Res A Clin Mol Teratol*  
804 [Internet]. 2005 Nov;73(11):897–903 PMID16228975. Available from:  
805 <http://dx.doi.org/10.1002/bdra.20190>
- 806 65. Myrie SB, Pinder MA. Skeletal muscle and fetal alcohol spectrum disorder. *Biochem*  
807 *Cell Biol* [Internet]. 2018 Apr;96(2):222–9 PMID29091741. Available from:  
808 <http://dx.doi.org/10.1139/bcb-2017-0118>
- 809 66. Davis TA, Fiorotto ML. Regulation of muscle growth in neonates. *Curr Opin Clin*  
810 *Nutr Metab Care* [Internet]. 2009 Jan;12(1):78–85 PMID19057192PMC2653196.  
811 Available from: <http://dx.doi.org/10.1097/MCO.0b013e32831cef9f>
- 812 67. Lin G, Wang X, Wu G, Feng C, Zhou H, Li D, et al. Improving amino acid nutrition to  
813 prevent intrauterine growth restriction in mammals. *Amino Acids* [Internet]. 2014  
814 Jul;46(7):1605–23 PMID24658999. Available from:  
815 <http://dx.doi.org/10.1007/s00726-014-1725-z>
- 816 68. Olney JW, Wozniak DF, Jevtovic-Todorovic V, Farber NB, Bittigau P, Ikonomidou  
817 C. Glutamate and GABA receptor dysfunction in the fetal alcohol syndrome.  
818 *Neurotox Res* [Internet]. 2002 Jun;4(4):315–25 PMID12829421. Available from:  
819 <http://dx.doi.org/10.1080/1029842021000010875>
- 820 69. Davies M. The role of GABAA receptors in mediating the effects of alcohol in the  
821 central nervous system. *J Psychiatry Neurosci* [Internet]. 2003 Jul;28(4):263–74  
822 PMID12921221PMC165791. Available from:  
823 <https://www.ncbi.nlm.nih.gov/pubmed/12921221>
- 824 70. Lobo IA, Harris RA. GABA(A) receptors and alcohol. *Pharmacol Biochem Behav*  
825 [Internet]. 2008 Jul;90(1):90–4 PMID18423561PMC2574824. Available from:  
826 <http://dx.doi.org/10.1016/j.pbb.2008.03.006>
- 827 71. Smiley JF, Saito M, Bleiwas C, Masiello K, Ardekani B, Guilfoyle DN, et al.  
828 Selective reduction of cerebral cortex GABA neurons in a late gestation model of  
829 fetal alcohol spectrum disorder. *Alcohol* [Internet]. 2015 Sep;49(6):571–80  
830 PMID26252988PMC4554880. Available from:  
831 <http://dx.doi.org/10.1016/j.alcohol.2015.04.008>
- 832 72. Wozniak JR, Fink BA, Fuglestad AJ, Eckerle JK, Boys CJ, Sandness KE, et al.  
833 Four-year follow-up of a randomized controlled trial of choline for neurodevelopment  
834 in fetal alcohol spectrum disorder. *J Neurodev Disord* [Internet]. 2020 Mar  
835 12;12(1):9 PMID32164522PMC7066854. Available from:  
836 <http://dx.doi.org/10.1186/s11689-020-09312-7>

- 837 73. Milbocker KA, Klintsova AY. Examination of cortically projecting cholinergic neurons  
838 following exercise and environmental intervention in a rodent model of fetal alcohol  
839 spectrum disorders. *Birth Defects Res* [Internet]. 2021 Feb 1;113(3):299–313  
840 PMID33174398PMC8274426. Available from: <http://dx.doi.org/10.1002/bdr2.1839>
- 841 74. Macht VA, Vetreno RP, Crews FT. Cholinergic and neuroimmune signaling interact  
842 to impact adult hippocampal neurogenesis and alcohol pathology across  
843 development. *Front Pharmacol* [Internet]. 2022 Mar 2;13:849997  
844 PMID35308225PMC8926387. Available from:  
845 <http://dx.doi.org/10.3389/fphar.2022.849997>
- 846 75. Hawkins EG, Martin I, Kondo LM, Judy ME, Brings VE, Chan C-L, et al. A novel  
847 cholinergic action of alcohol and the development of tolerance to that effect in  
848 *Caenorhabditis elegans*. *Genetics* [Internet]. 2015 Jan;199(1):135–49  
849 PMID25342716PMC4286678. Available from:  
850 <http://dx.doi.org/10.1534/genetics.114.171884>
- 851 76. Kaufman MH. Ethanol-induced chromosomal abnormalities at conception. *Nature*  
852 [Internet]. 1983; PMID6682181. Available from: <http://dx.doi.org/10.1038/302258a0>
- 853 77. Kaufman MH, Bain IM. Influence of ethanol on chromosome segregation during the  
854 first and second meiotic divisions in the mouse egg. *J Exp Zool* [Internet]. 1984;  
855 PMID6429271. Available from: <http://dx.doi.org/10.1002/jez.1402300217>
- 856 78. Shi Q, Martin RH. Aneuploidy in human sperm: a review of the frequency and  
857 distribution of aneuploidy, effects of donor age and lifestyle factors. *Cytogenet Cell*  
858 *Genet* [Internet]. 2000;90(3–4):219–26 PMID11124518. Available from:  
859 <http://dx.doi.org/56773>
- 860 79. Mews P, Egervari G, Nativio R, Sidoli S, Donahue G, Lombroso SI, et al. Alcohol  
861 metabolism contributes to brain histone acetylation. *Nature* [Internet].  
862 2019;574(7780):717–21 PMID31645761. Available from:  
863 <http://dx.doi.org/10.1038/s41586-019-1700-7>

864 **Table 1**

| <b>Pathway</b>                                                      | <b>Generation/Condition</b> |
|---------------------------------------------------------------------|-----------------------------|
| Peptide metabolic process                                           | F105,F305,F1005,F3005       |
| Carboxylic acid metabolic process                                   | F105,F305,F1005,F3005       |
| Small molecule biosynthetic process                                 | F105,F305,F1005,F3005       |
| Defense response                                                    | F105,F305,F1005,F3005       |
| Translation                                                         | F105,F305,F1005             |
| Embryo development ending in birth or egg hatching                  | F105,F305,F1005             |
| Aging                                                               | F105,F1005,F3005            |
| Ribosomal large subunit biogenesis                                  | F105,F305,F1005             |
| Ribosome assembly                                                   | F105,F305,F1005             |
| Cytoskeleton organization                                           | F105,F305,F3005             |
| Multi-organism process                                              | F105,F305,F1005             |
| Ribose phosphate metabolic process                                  | F105,F305,F1005             |
| Cellular process involved in reproduction in multicellular organism | F105,F305,F1005             |
| Actin cytoskeleton organization                                     | F105,F305,F3005             |
| Protein catabolic process                                           | F105,F1005,F3005            |
| Response to heat                                                    | F105,F305,F1005             |
| Multicellular organismal movement                                   | F105,F305,F3005             |
| rRNA binding                                                        | F105,F305,F1005             |
| Phosphotransferase activity, phosphate group as acceptor            | F105,F305,F1005             |
| Threonine-type endopeptidase activity                               | F105,F305,F1005             |

865

866 **Table 1: Shared pathways identified through DEG analysis across both exposures**  
 867 **and generations.**

868 Top 20 shared pathways identified by the union of all cell type specific DEGs across the  
 869 four conditions. F105 indicates 0.5% ethanol exposure at the F1 generation. F1005  
 870 indicates 0.05% ethanol exposure at the F1 generation. F305 indicates 0.5% ethanol  
 871 exposure at the F3 generation. F3005 indicates 0.05% ethanol exposure at the F3  
 872 generation.

873 **Figure 1: Adult *C. elegans* snRNA-seq sample preparation, analysis, and t-SNE**  
874 **projection**

875 **A.** Experimental flow for single-nucleus isolation and snRNA-seq analysis. **B.** t-  
876 distributed stochastic neighbor embedding (t-SNE) plot of cells from all the samples with  
877 clustering through unsupervised Louvain clustering. Cluster molecular characterization  
878 and identity is presented in the corresponding dashboard (Supplemental file 1).

879

880 **Figure 2: Cluster-resolved expression of cell type-specific markers.**

881 Example of cluster-specific expression of cell type specific markers for the  
882 spermatheca, epithelial cells, GABA and mechanosensory neurons, germline, and  
883 coelomocyte. Right column: cluster specific expression. Middle column: representative  
884 *in situ* expression data from NEXTDB for corresponding marker. Left column: gene  
885 expression dot plot of known cell type specific markers.

886

887 **Figure 3: Global and cluster-specific alterations in gene expression by inter- or**  
888 **trans-generational ethanol exposure.**

889 **A.** Venn diagram based on the union of DEGs across all the cell types, separated by  
890 Up-regulated DEGs only (left), Downregulated genes only (right), and all DEGs  
891 (middle). **B, C.** Euclidean distance sensitivity analysis of all the cell clusters at the F1  
892 generation (B) or F3 generation (C). X-axis indicates cluster number and y-axis  
893 indicates log fold change compared to Euclidean distance obtained by permuting  
894 treatment labels. Significance was assessed based on comparing Euclidean distance  
895 against 1,000 random permuted labels. **D, E.** Expression of *tra-2* in cluster 23 at the



896 F1 (D) and *mex-3* in cluster 12 at the F3 (E). **F-I.** Validation of snRNA-seq data through  
897 single molecule fluorescence *in situ* hybridization (smFISH) by confocal imaging (F,G)  
898 followed by FISH-Quant (H,I). Scale bar 5  $\mu$ m. 3 biological replicates, 2 worms per  
899 repeat, 10 nuclei per germline. \*P<0.05, \*\*\*P<0.001. Welch's t-test.

900

901 **Figure 4: Phenotypic enrichment in response to inter- or trans-generational**  
902 **ethanol exposure.**

903 **A,C.** Dot heatmap of top shared WormBase phenotype across cell types with  
904 significantly altered Euclidean distance metric at the F1 (A) or F3 (C). Dot size  
905 corresponded to  $-\log(\text{FDR})$  obtained from enrichment analysis and dot color  
906 corresponded  $-\log(\text{median fold change})$  of overlapping genes in each pathway. **B,D.** Bar  
907 plot showing the proportion of top WormBase phenotype annotations from all enriched  
908 pathways ("dataset") and WormBase phenotype database ("Background\_all\_path") at  
909 the F1 (B) or F3 (D). For each WormBase phenotype from the original database we  
910 retrieved the corresponding WormBase phenotype annotations by querying EBI OLS  
911 API, followed by selecting the top 20 shared phenotypes. Proportions were calculated  
912 based on the proportion of annotations among all enriched pathways ("dataset") and the  
913 WormBase phenotype database ("Background\_all\_path"). Fisher's exact test was used  
914 to compare proportions between the two conditions in each annotation category.

915

916 **Figure 5: P0 ethanol exposure causes reproductive dysfunction at the F1 and F3**  
917 **generations.**

918 P0 hermaphrodites were exposed to water, 0.05% ethanol, or 0.50% ethanol. **A,B.**  
919 Number of apoptotic nuclei per gonadal arm in N2 worms at the F1 and F3 exposed to  
920 the indicated ethanol levels, N=4-5, 22 worms per repeat. Scale bars = 10 $\mu$ m. **C.**  
921 Assessment of errors of X chromosome segregation as measured by *Pxol-1::gfp*  
922 reporter. Out of 30 total worms per repeat, the percent (%) of worms with at least 1  
923 GFP+ embryo was recorded, N=6, 30 worms per repeat. **D.** Percent embryonic lethality  
924 per worm was measured for N2, N=4-10, 2-3 worms per repeat (D). One-way ANOVA  
925 with Dunnet correction. \*P<0.05, \*\*P<0.01, \*\*\*P<0.001, \*\*\*\*P<0.0001.



# Figure 1

**A**

① Exposure and nuclear preparation

Ethanol exposure

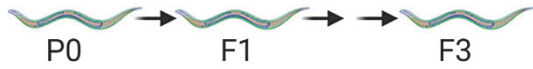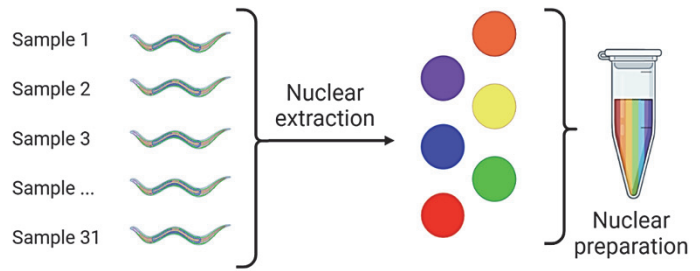

② Data collection and analysis

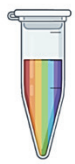

snRNA-seq

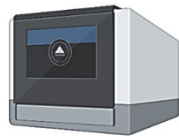

Diem

SoupX

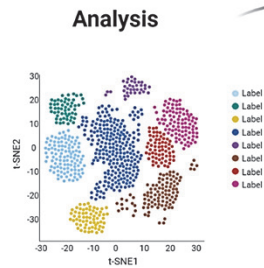

Validation

T.E.A.  
Wormbase  
NextDB  
smFISH

**B**

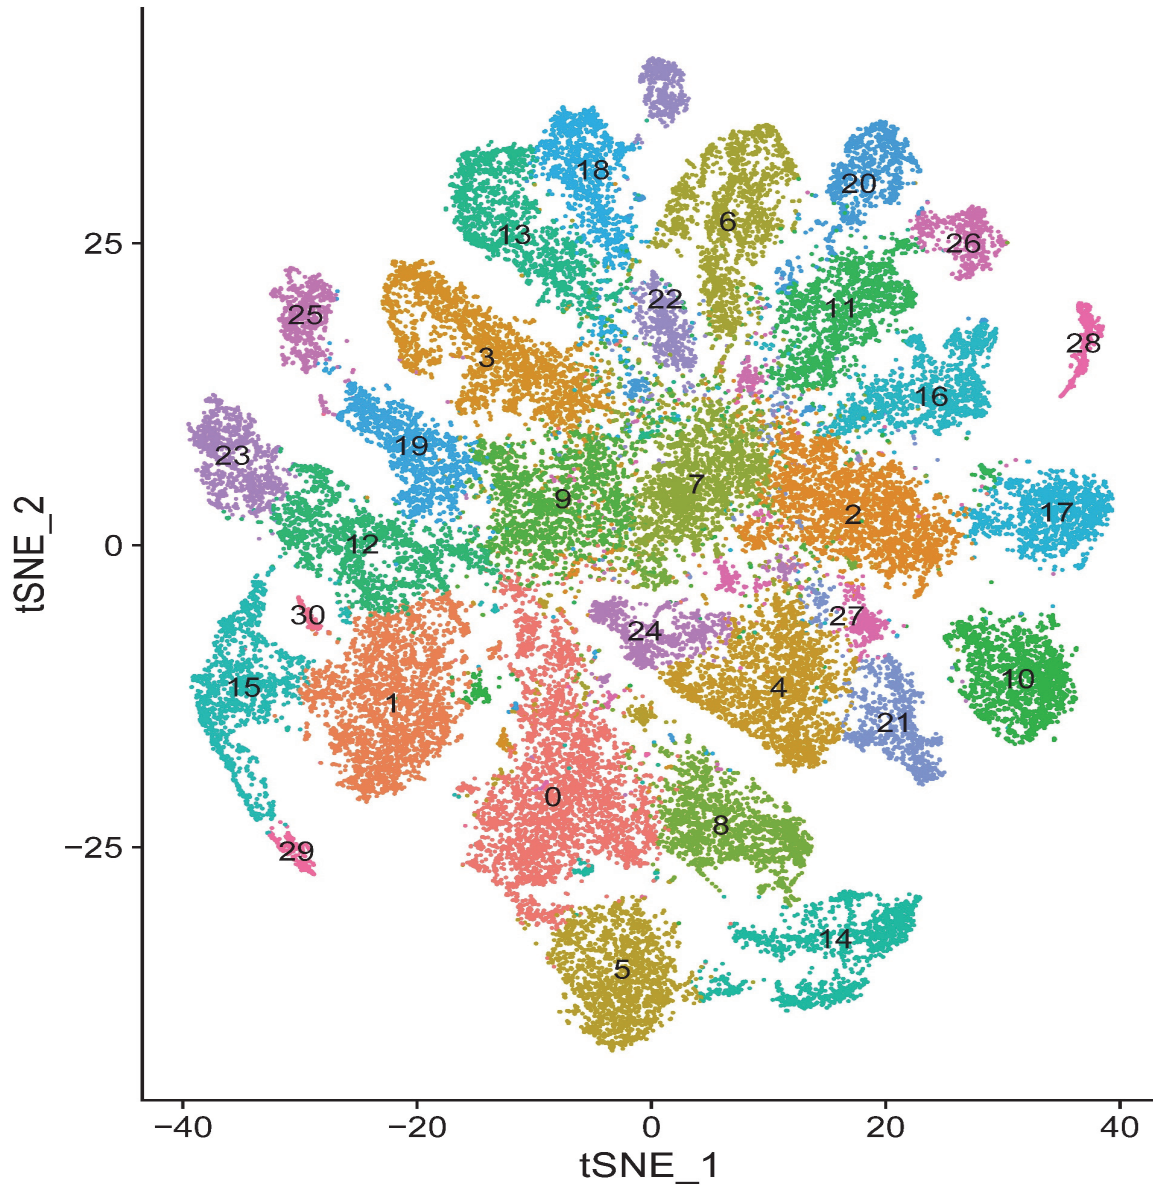

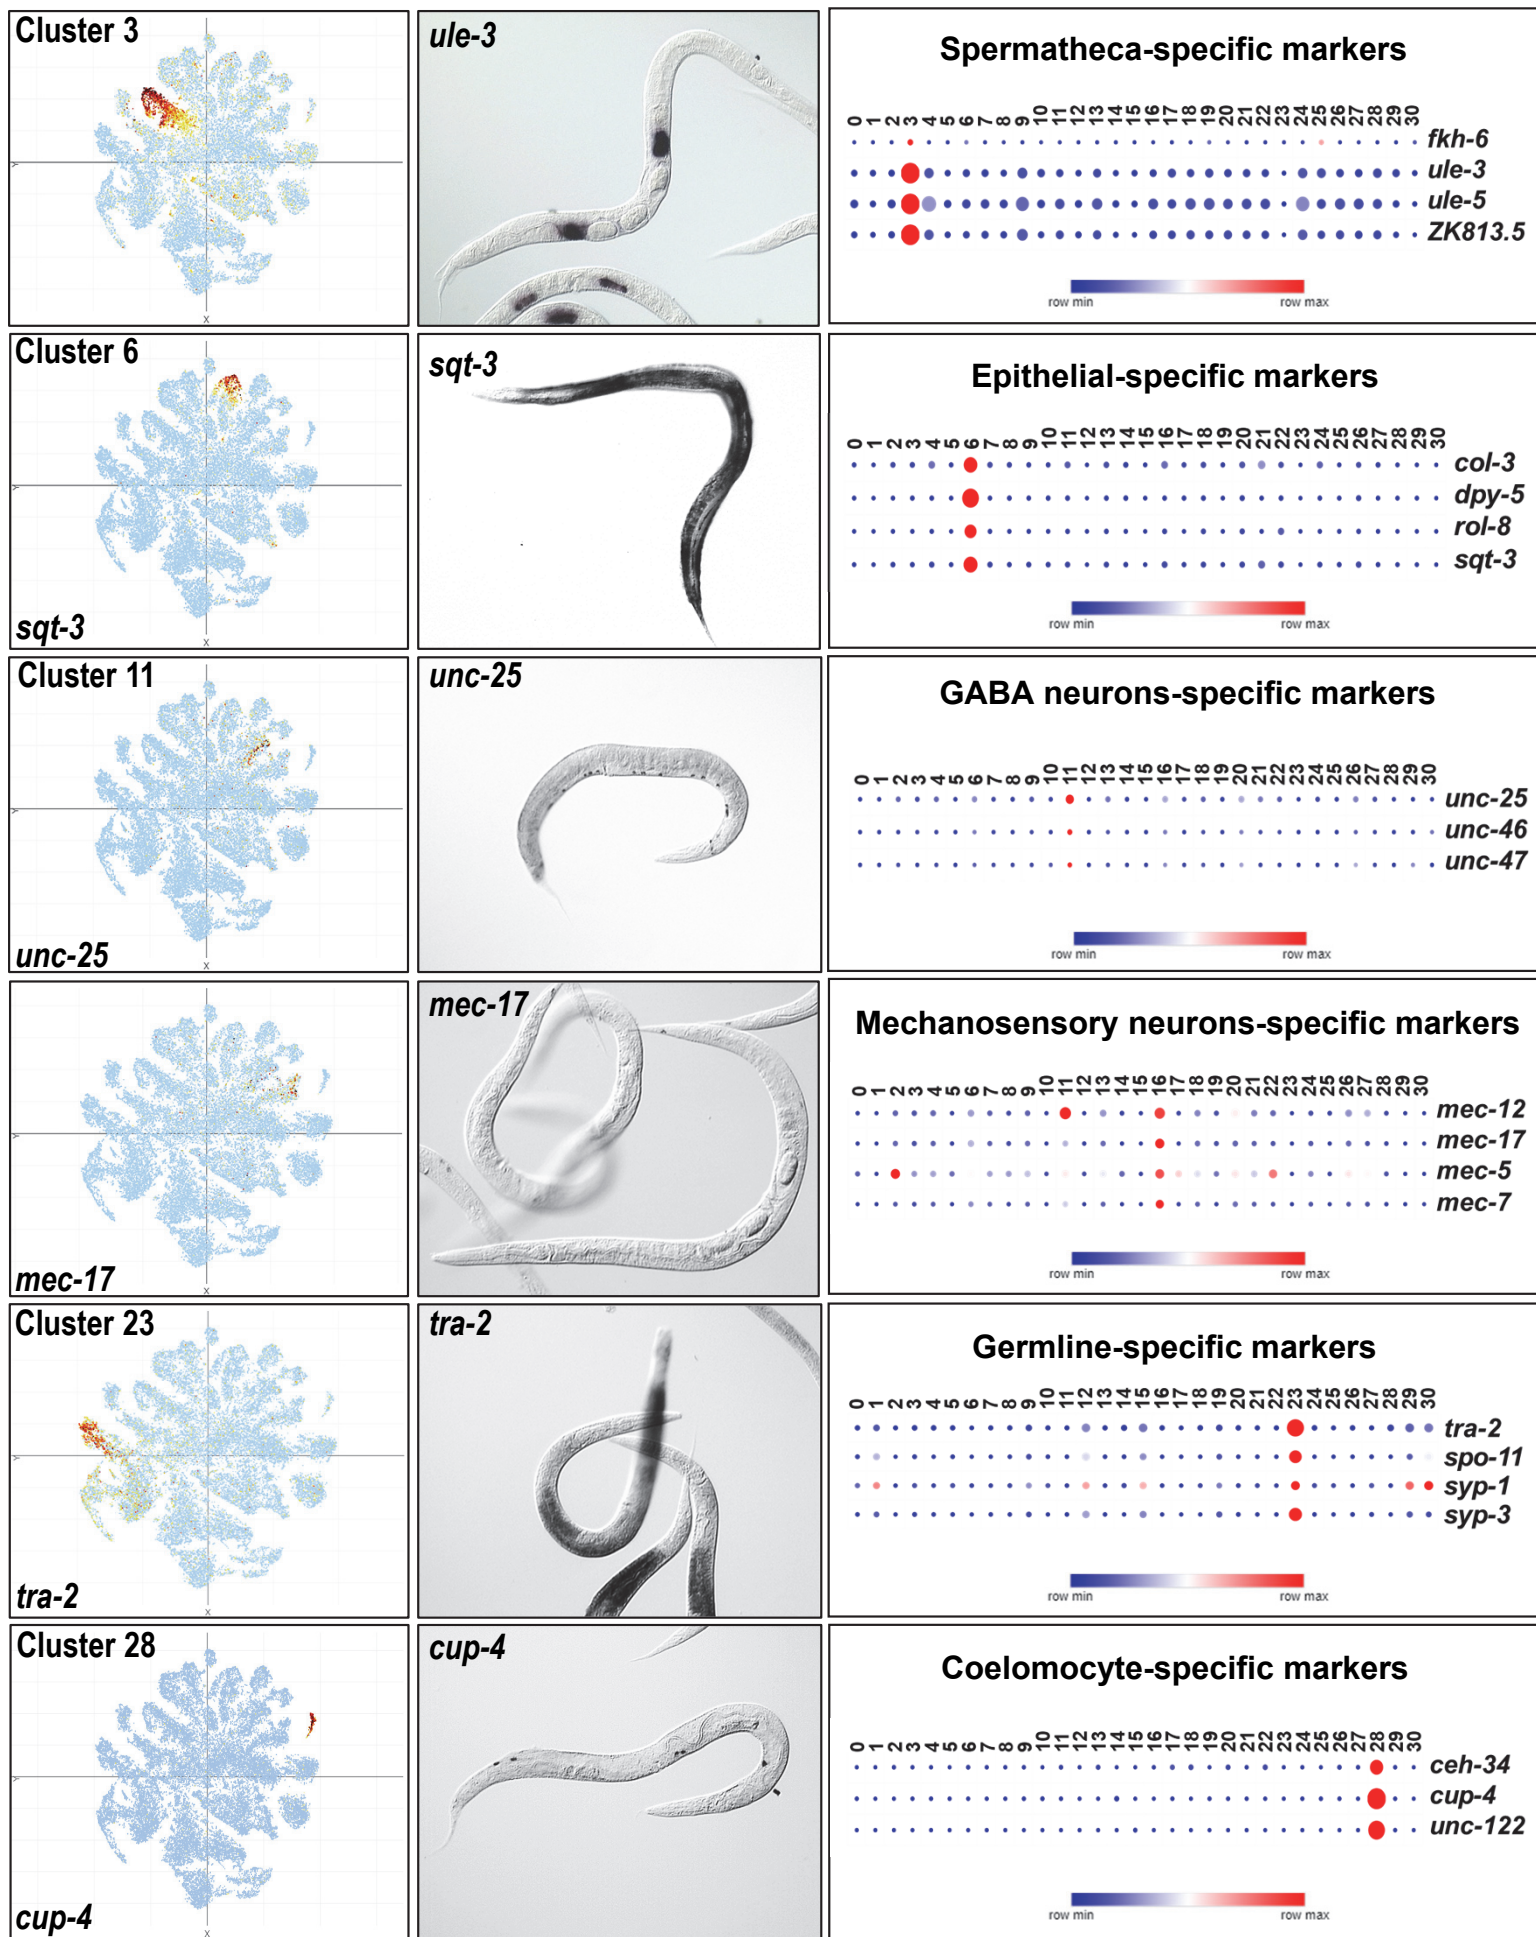



# Figure 3

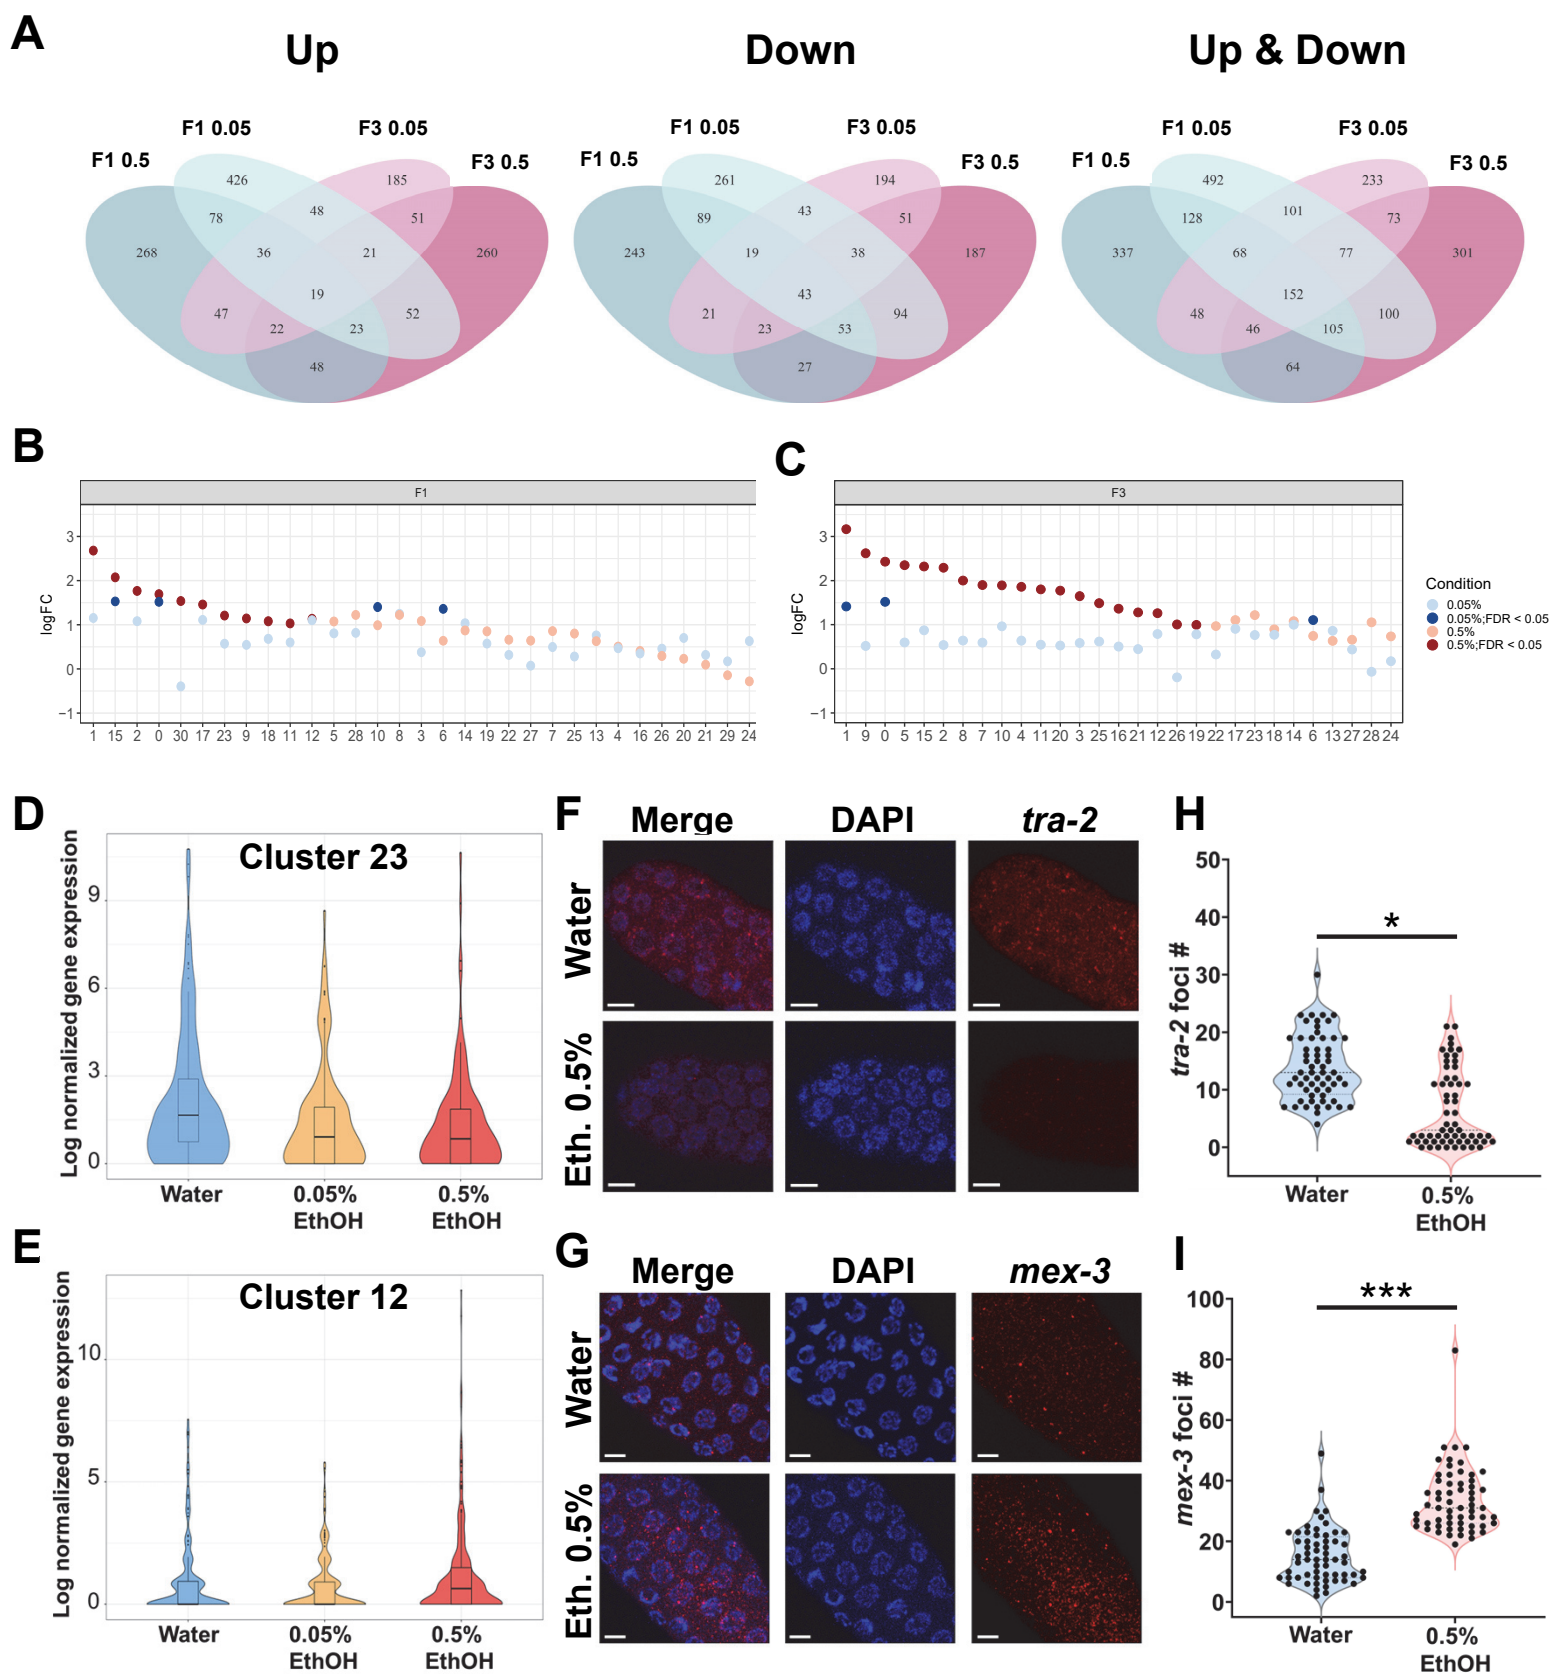

# Figure 4

**A**

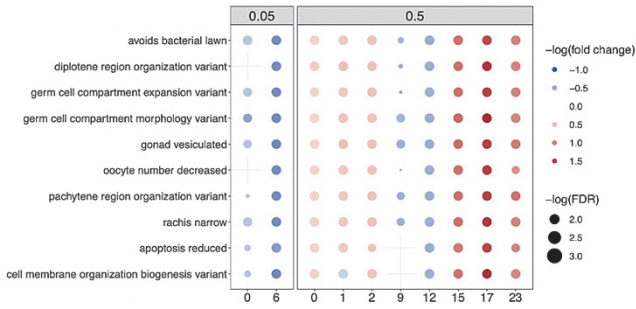

**B**

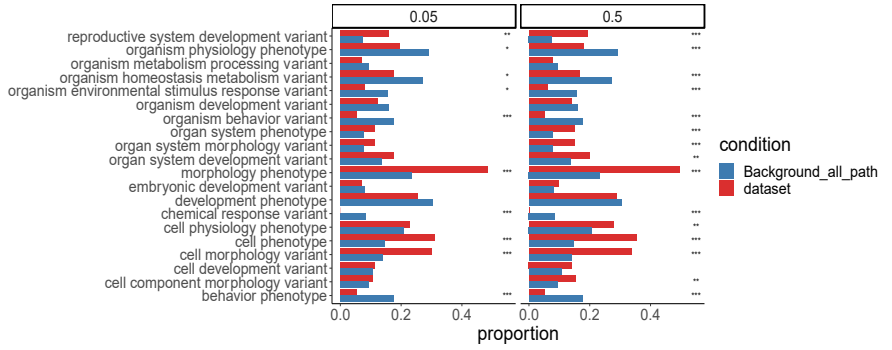

**C**

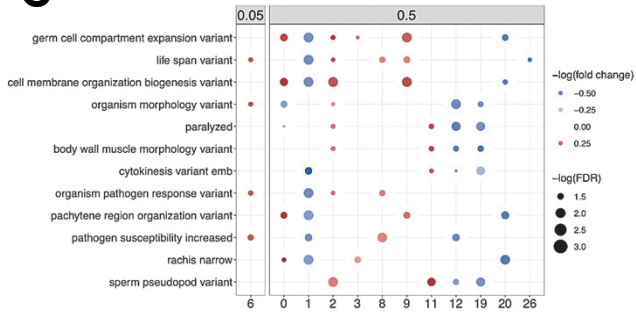

**D**

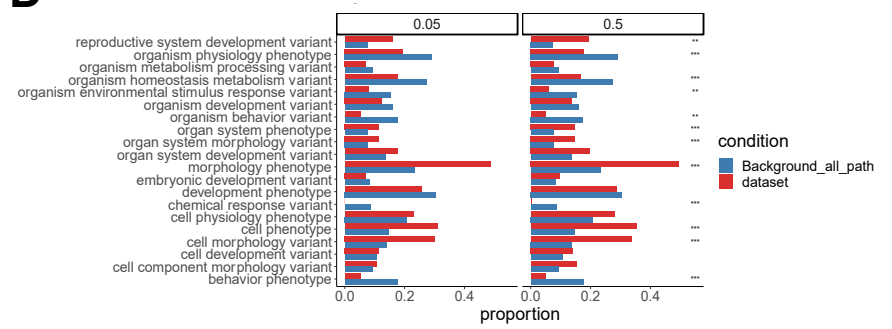

# Figure 5

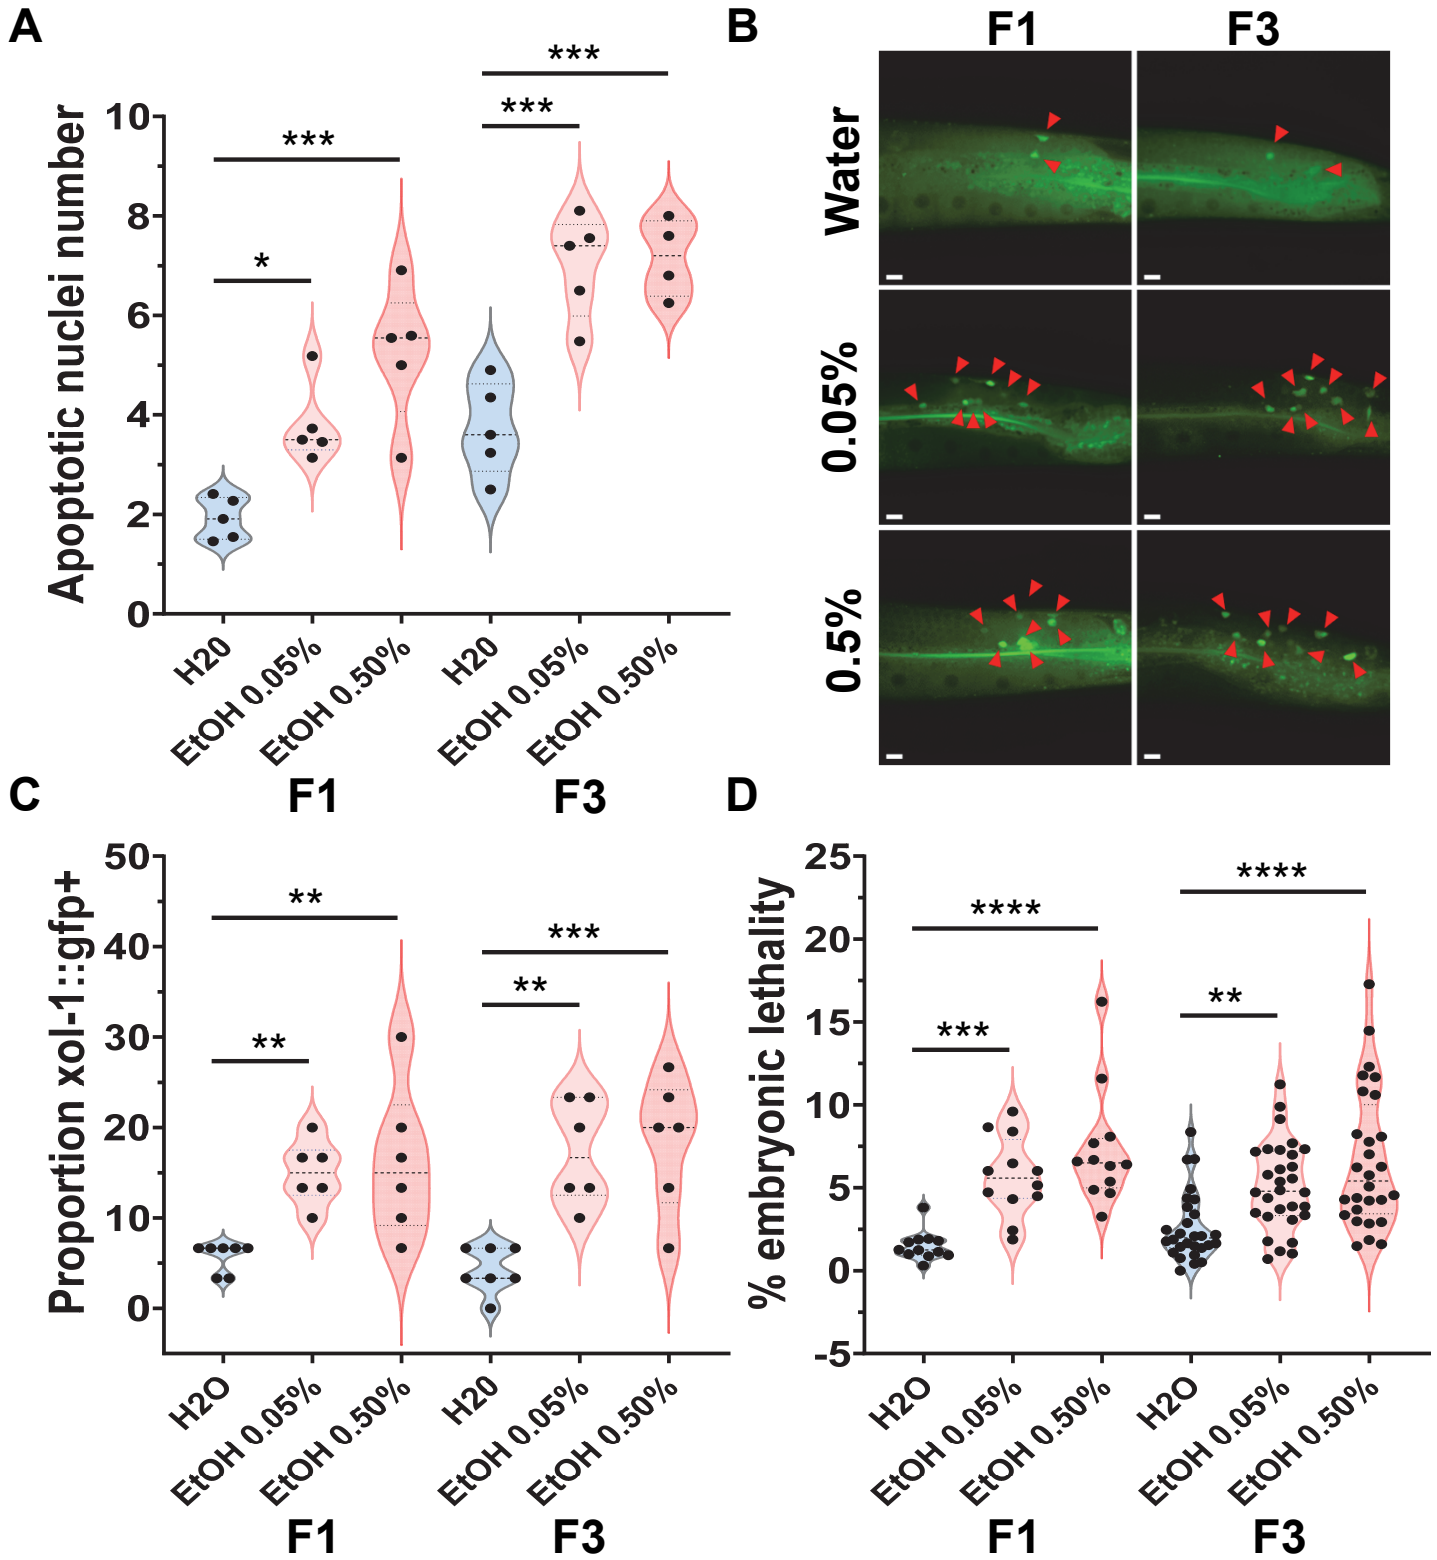

# Figure S1

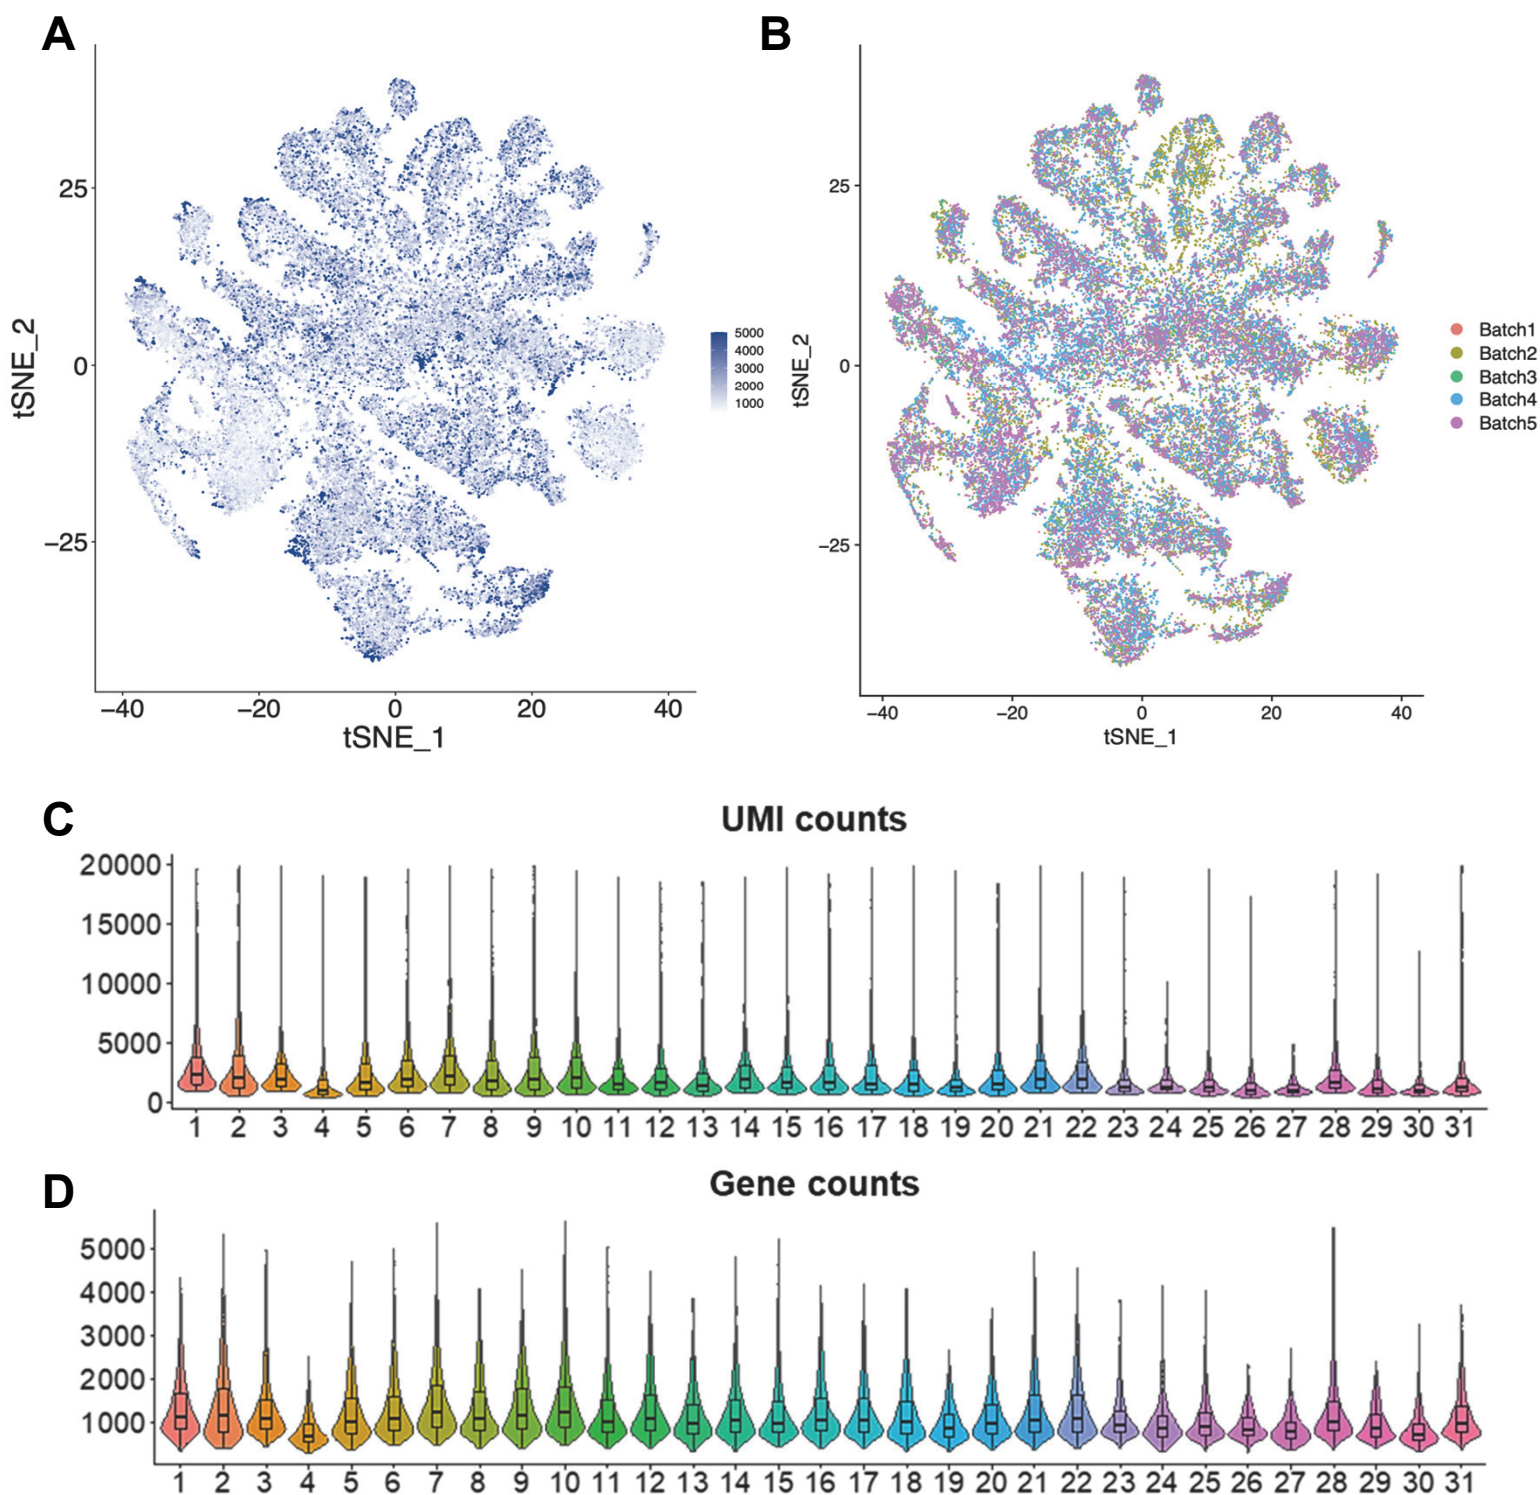

## Figure 1: UMI, gene count, and batch distributions

**A.** UMI (unique molecular identifier) distribution as tSNE plot. X and Y-axis are representative tSNE axis. Each dot represents a cell and color scale is plotted based on UMI count in each cell. UMI lower than 1000 are plotted as 1000 and higher than 5000 are plotted as 5000. **B.** tSNE plot colored by batch after batch effect correction by canonical correlation analysis. **C,D.** Violin and boxplot of UMI (unique molecular identifier) and gene counts per cell in each sample across 31 single-nuclei samples.



## Figure S2

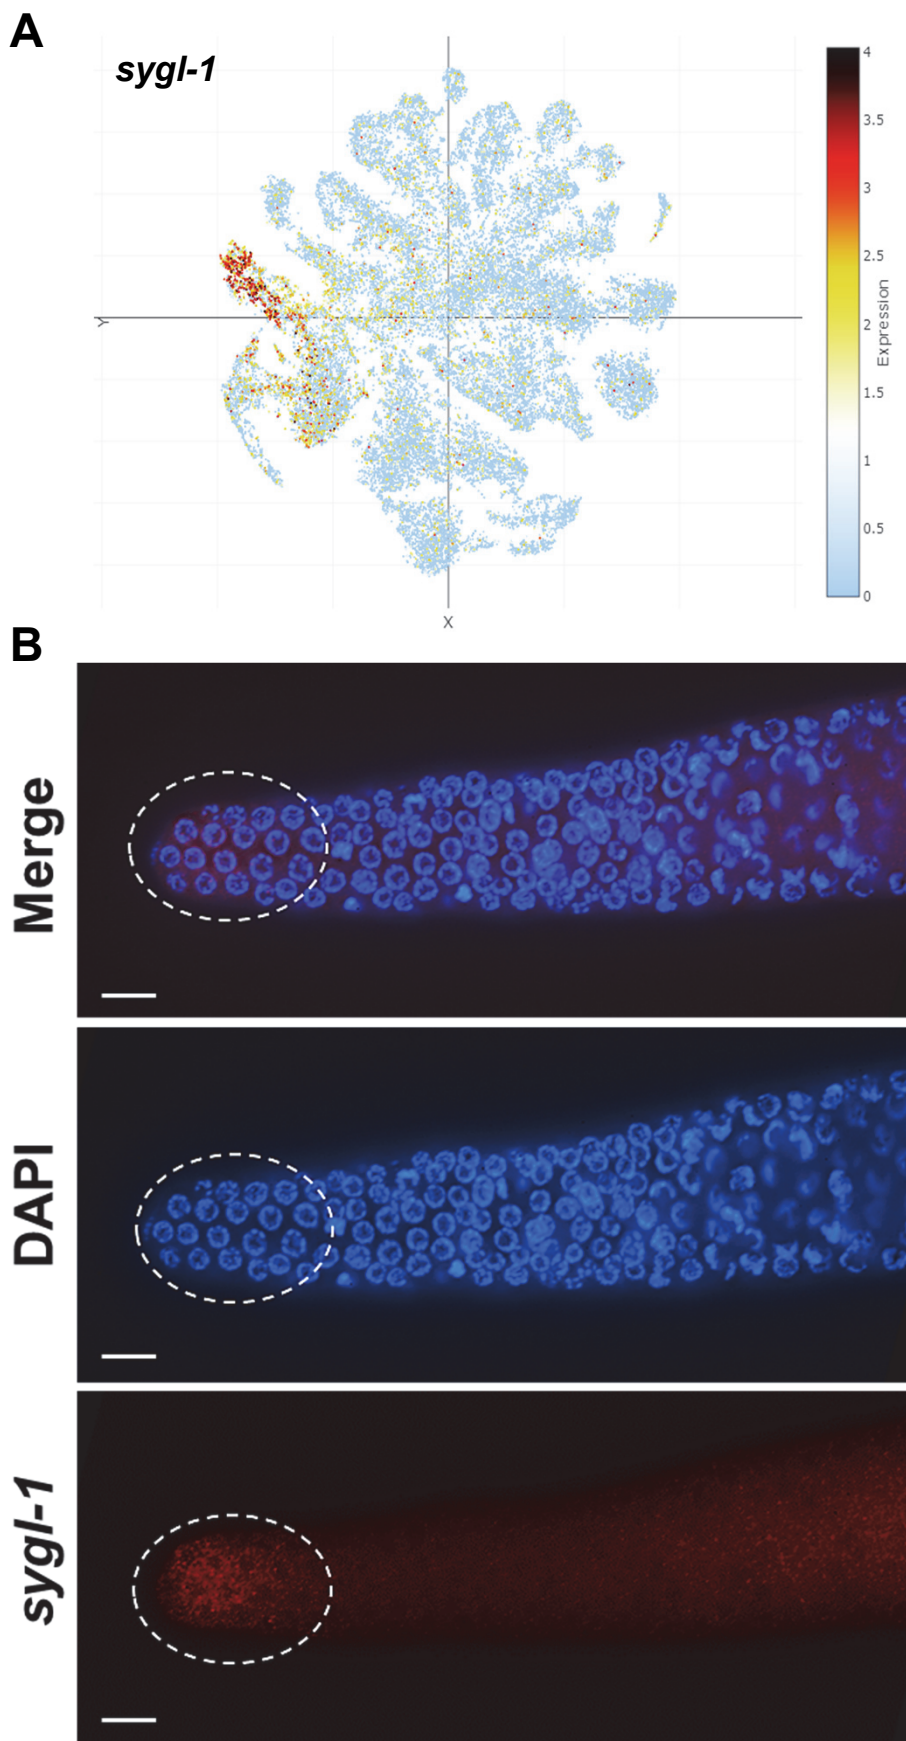

### Figure S2: tSNE expression and smFISH for *sygl-1* transcript

**A.** Expression of *sygl-1* transcript from the adult *C. elegans* snRNA-seq data set. The bulk of its expression resolves to cluster 23. **B.** smFISH for *sygl-1* transcript showing its well-described expression within the distal gonad (circle) as well as some expression more proximally. Scale bar = 10 $\mu$ m.



# Figure S3

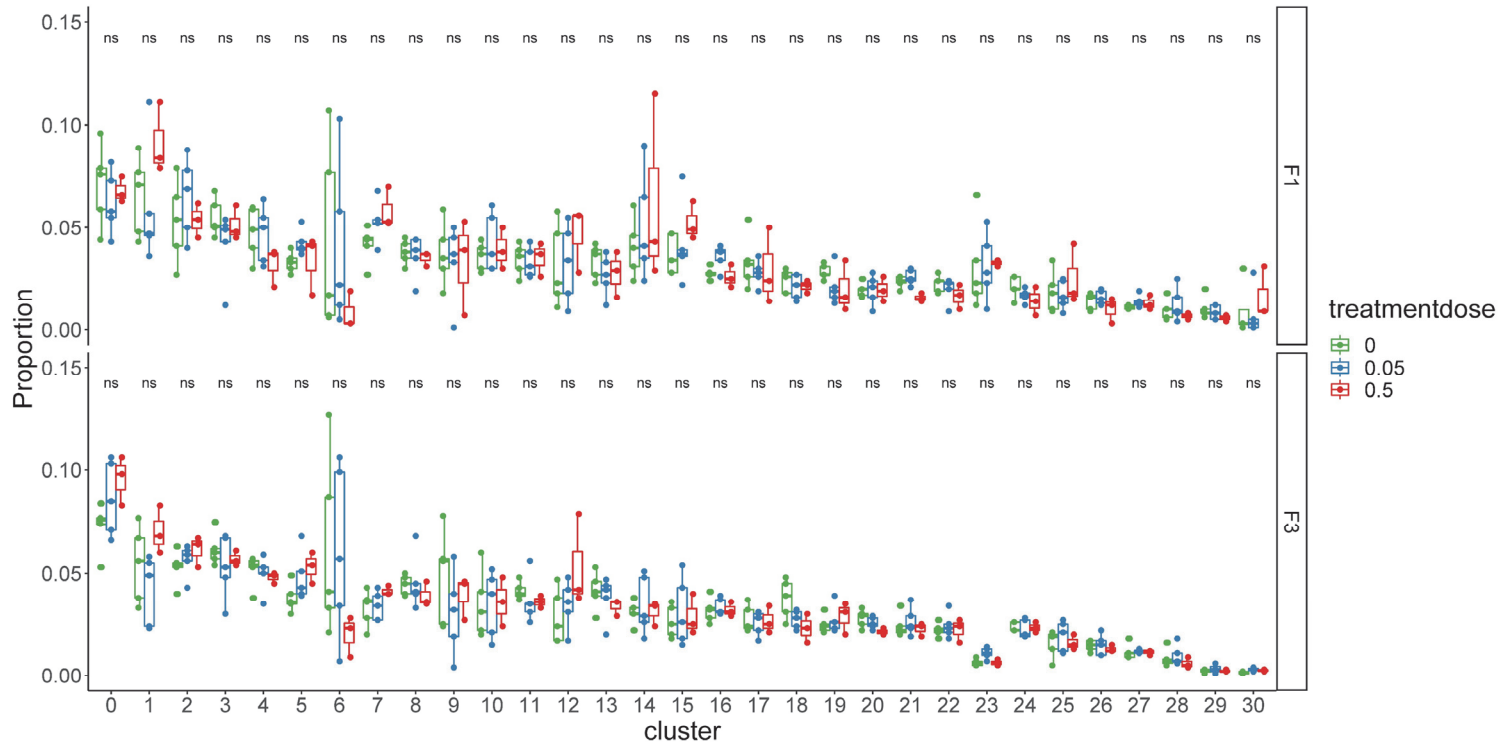

## Figure S3: F1 and F3 cluster proportions

Proportion distribution plot of all F1 and F3 samples colored by different treatment dose (0, 0.05%, and 0.5% ethanol), each dot represents one sample. X-axis indicates cluster number assigned by Louvain clustering and Y-axis indicates cells of that cluster divided by all cells from that specific sample. All conditions were non-significant based on post-hoc Tukey statistic.

# Figure S4

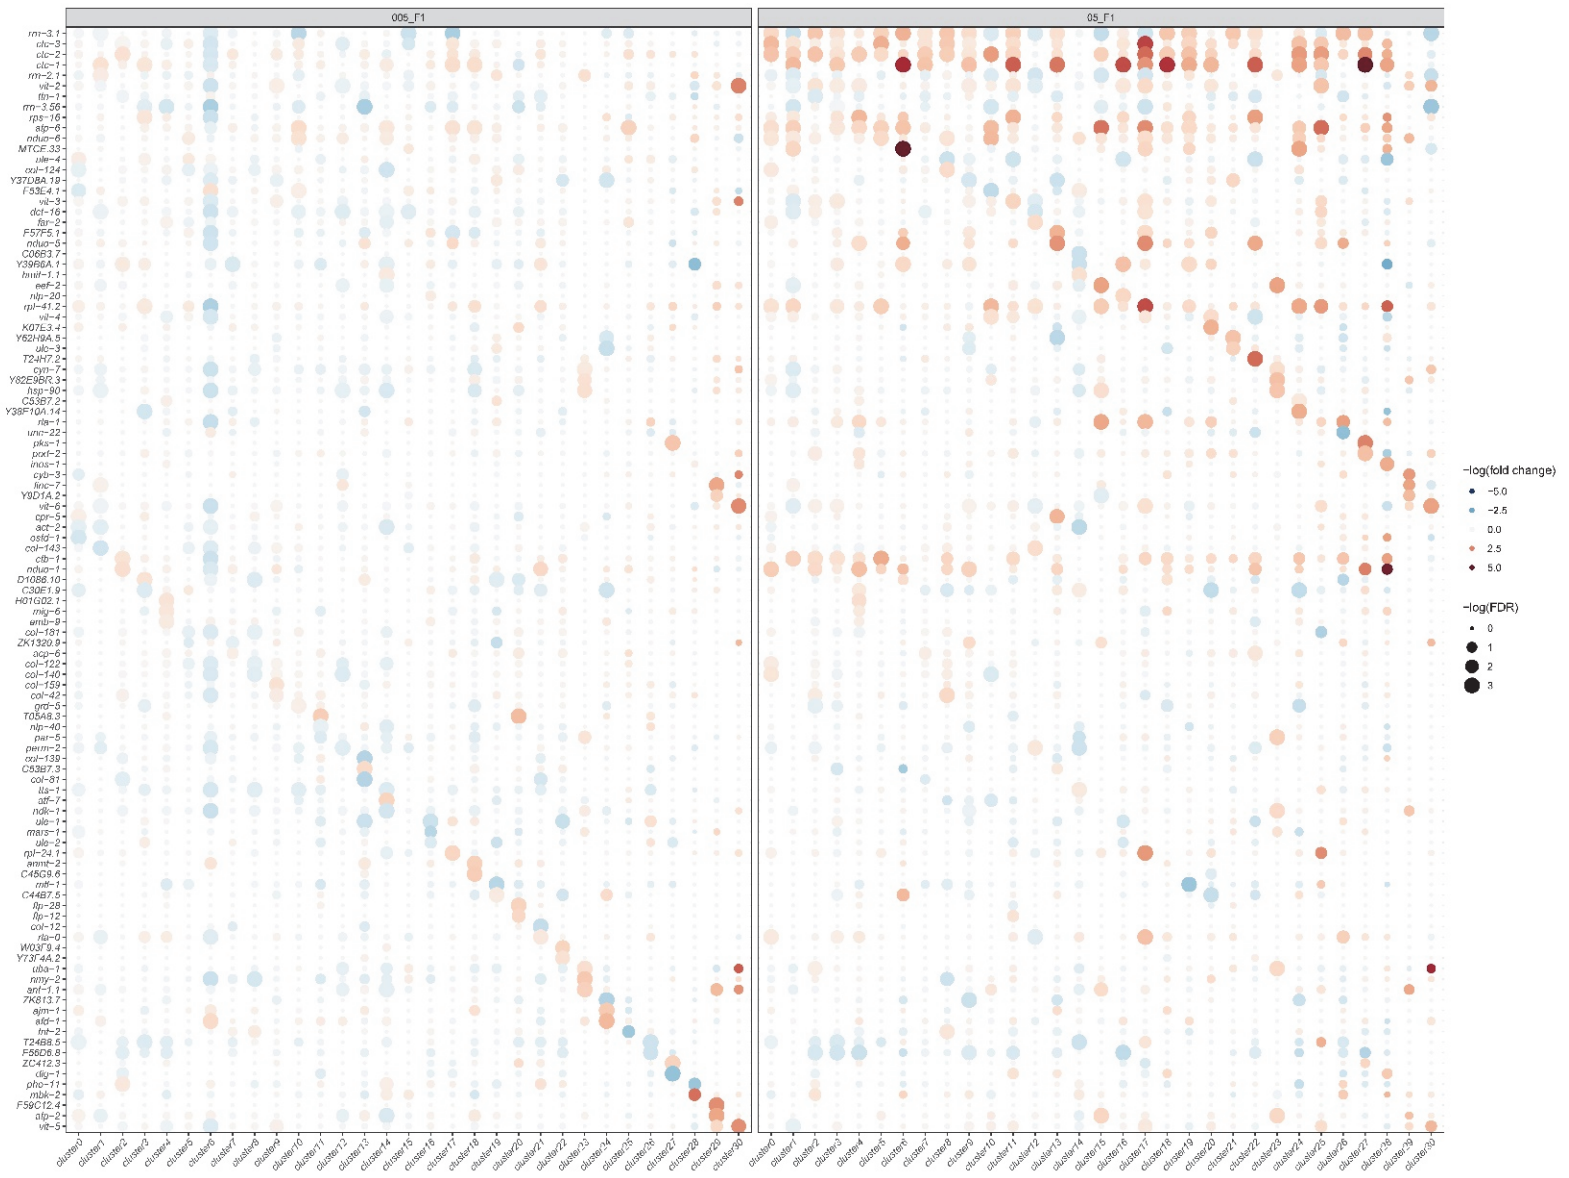

**Figure S4: Dot heatmap of top 3 differentially expressed genes across clusters at the F1.** X-axis indicates different clusters representing different tissues and Y-axis indicates top 3 differentially expressed genes after ethanol treatment across clusters ranked by monocle based FDR. The plot is further separated by different ethanol doses (0.05% on the left and 0.5% on the right). The size of the dot is correlated to  $-\log(\text{FDR})$  of differential expression p-value and the color represents direction and scale of fold change with upregulation is shown in red and downregulation is shown in blue.

## Figure S5

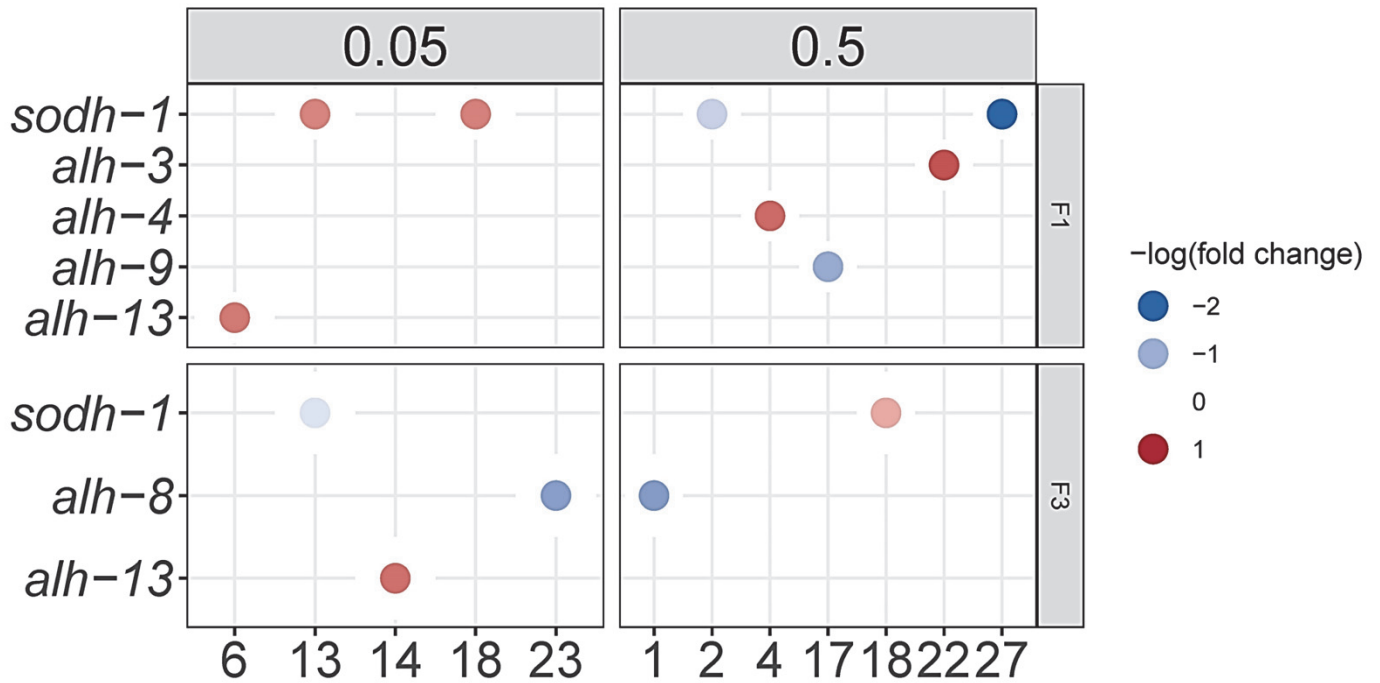

### Figure S5: Cluster-specific DEGs related to ethanol metabolism at F1 and F3.

Dot heatmap of ethanol metabolism related genes across different clusters, separated by exposure dose (0.05% or 0.5% ethanol) and generation (F1 or F3). Only DEGs with an FDR < 5% were plotted. Color indicates  $-\log_{10}(\text{fold change})$ .

# Figure S6

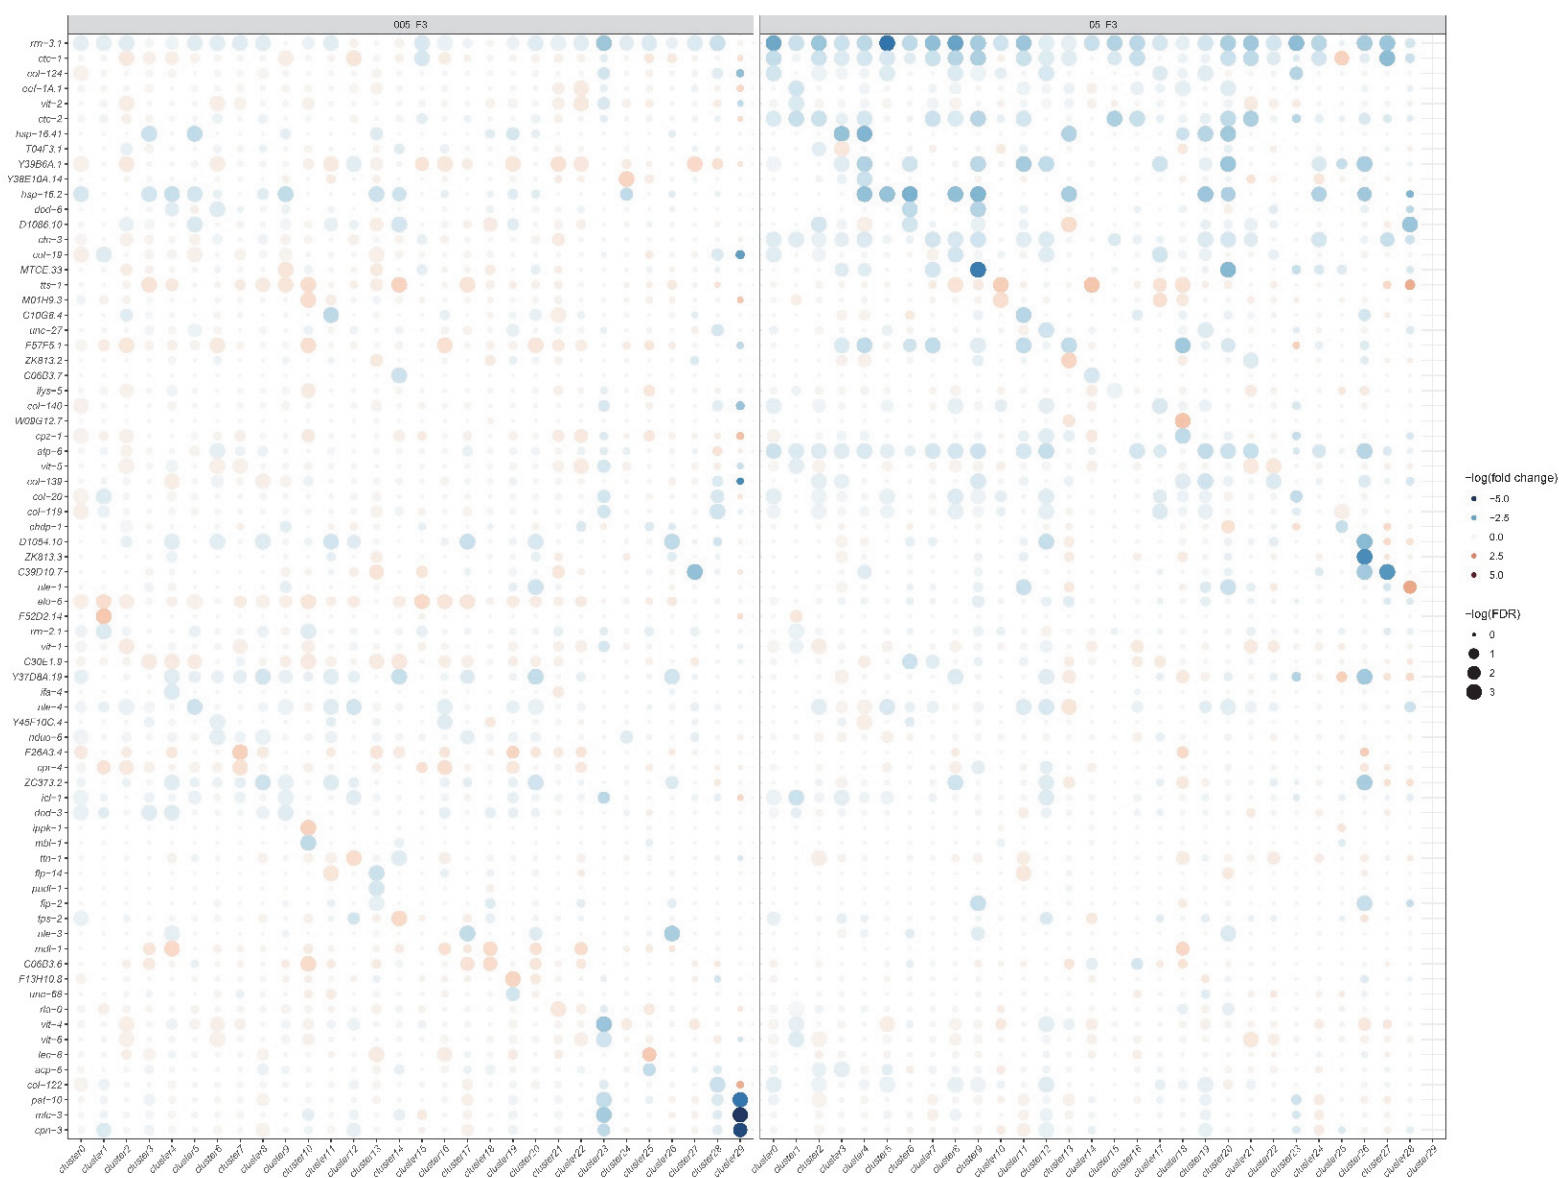

**Figure S6: Dot heatmap of top 3 differentially expressed genes across clusters at the F3.**

X-axis indicates different clusters representing different tissues and Y-axis indicates the top 3 differentially expressed genes after ethanol treatment across clusters ranked by monocle based FDR. The plot is further separated by different ethanol doses (0.05% on the left and 0.5% on the right). The size of the dot is correlated to  $-\log(\text{FDR})$  of differential expression p-value and the color represents direction and scale of fold change with upregulation is shown in red and downregulation is shown in blue.
